# Supplementary material for: COVID-19 Vaccination Status, Attitudes, and Values among US Adults in September 2021
Source: MDPI journal article supplement (doi:10.3390/jcm11133734), 2022-06-28
Supplement: s1 [file s1]

**Table S1. Frequency and Odds of COVID-19 Disease by Vaccine Attitudes, Trust in CDC and HDs, and Sociodemographic Characteristics**

*Numbers in the "Total" column indicate the percentage of the total weighted sample providing the September 2021 survey response in each row. Numbers in the "COVID-19 Disease" columns indicate the percentage of those whose experience with COVID-19 disease match that of the column header who provided the survey response in each row. The numbers in the "OR (95%CI)" column indicate the Odds Ratio of ever being diagnosed with COVID-19 vs never being diagnosed with COVID-19 by the survey response in each row. The numbers in the final column indicate the p-value of this association, boldface indicating statistical significance ( $p < 0.05$ ).*

| Survey Items                                                  | Total            | COVID-19 Disease, % <sup>b</sup> |          | OR (95%CI) <sup>f</sup> | p-value <sup>c</sup> |
|---------------------------------------------------------------|------------------|----------------------------------|----------|-------------------------|----------------------|
|                                                               | (%) <sup>a</sup> | Never Had                        | Ever Had |                         |                      |
| All                                                           | 100              |                                  |          |                         |                      |
| <b>Constructs <sup>d</sup></b>                                |                  |                                  |          |                         |                      |
| Confidence in vaccines                                        | 65               | 69                               | 54       | 0.52 (0.40-0.68)        | <b>&lt;0.01</b>      |
| Trust in the Centers for Disease Control and Prevention (CDC) | 47               | 52                               | 36       | 0.54 (0.41-0.71)        | <b>&lt;0.01</b>      |
| Trust in local and state health departments (HDs)             | 46               | 50                               | 36       | 0.56 (0.43-0.74)        | <b>&lt;0.01</b>      |
| <b>Sociodemographic Characteristics</b>                       |                  |                                  |          |                         |                      |
| Gender                                                        |                  |                                  |          |                         | 0.12                 |
| Female                                                        | 52               | 51                               | 57       | ref <sup>k</sup>        |                      |
| Male                                                          | 48               | 49                               | 43       | 0.81 (0.62-1.05)        |                      |
| Age (years)                                                   |                  |                                  |          |                         | <b>&lt;0.01</b>      |
| 18-29                                                         | 20               | 19                               | 23       | ref <sup>k</sup>        |                      |
| 30-44                                                         | 25               | 23                               | 31       | 1.14 (0.76-1.71)        | 0.53                 |
| 45-59                                                         | 24               | 24                               | 26       | 0.90 (0.60-1.35)        | 0.61                 |
| 60+                                                           | 30               | 34                               | 21       | 0.53 (0.35-0.80)        | <b>&lt;0.01</b>      |

|                                                           |    |    |    |                  |                 |
|-----------------------------------------------------------|----|----|----|------------------|-----------------|
| Education (attained)                                      |    |    |    |                  | 0.39            |
| <High School                                              | 9  | 9  | 11 | ref <sup>k</sup> |                 |
| High School                                               | 28 | 27 | 30 | 0.89 (0.55-1.45) | 0.64            |
| Some College                                              | 28 | 27 | 26 | 0.79 (0.49-1.27) | 0.33            |
| Bachelors or Higher                                       | 35 | 36 | 32 | 0.71 (0.44-1.14) | 0.16            |
| Race/Ethnicity                                            |    |    |    |                  | 0.24            |
| White, non-Hispanic                                       | 63 | 63 | 60 | ref <sup>k</sup> |                 |
| Black, non-Hispanic                                       | 12 | 12 | 11 | 0.95 (0.65-1.38) | 0.80            |
| Hispanic                                                  | 8  | 9  | 8  | 1.39 (1.04-1.86) | <b>0.02</b>     |
| Other, non-Hispanic                                       | 17 | 16 | 21 | 0.97 (0.53-1.79) | 0.93            |
| Region                                                    |    |    |    |                  | 0.41            |
| Northeast                                                 | 17 | 18 | 19 | ref <sup>k</sup> |                 |
| Midwest                                                   | 21 | 20 | 21 | 1.01 (0.66-1.54) | 0.96            |
| South                                                     | 38 | 39 | 34 | 0.79 (0.54-1.15) | 0.22            |
| West                                                      | 24 | 24 | 26 | 1.00 (0.67-1.50) | 0.98            |
| Metropolitan Statistical Area status (metro vs non-metro) | 87 | 87 | 85 | 0.83 (0.56-1.23) | 0.35            |
| Employment status (working vs not working)                | 62 | 58 | 72 | 1.79 (1.35-2.37) | <b>&lt;0.01</b> |
| Household income                                          |    |    |    |                  | 0.75            |
| <\$50k                                                    | 30 | 30 | 33 | ref <sup>k</sup> |                 |
| \$50-85k                                                  | 31 | 31 | 30 | 0.90 (0.65-1.25) | 0.54            |
| \$85-150k                                                 | 19 | 19 | 19 | 0.91 (0.61-1.34) | 0.63            |

|                                    |    |    |    |                  |                 |
|------------------------------------|----|----|----|------------------|-----------------|
| \$150k+                            | 20 | 21 | 18 | 0.81 (0.55-1.19) | 0.28            |
| Household size                     |    |    |    |                  | <b>&lt;0.01</b> |
| 1                                  | 17 | 18 | 10 | ref <sup>k</sup> |                 |
| 2                                  | 35 | 37 | 34 | 1.68 (1.08-2.63) | <b>0.02</b>     |
| 3                                  | 19 | 19 | 15 | 1.42 (0.86-2.36) | 0.17            |
| 4+                                 | 29 | 26 | 41 | 2.88 (1.84-4.49) | <b>&lt;0.01</b> |
| Number of children (ages 2-17)     |    |    |    |                  | <b>0.03</b>     |
| 0                                  | 73 | 75 | 67 | ref <sup>k</sup> |                 |
| 1                                  | 11 | 9  | 13 | 1.52 (1.00-2.33) | 0.05            |
| 2                                  | 11 | 10 | 13 | 1.51 (1.00-2.27) | 0.05            |
| 3+                                 | 6  | 6  | 8  | 1.61 (0.99-2.64) | 0.06            |
| Political affiliation              |    |    |    |                  | 0.78            |
| Republican                         | 26 | 26 | 26 | ref <sup>k</sup> |                 |
| Democrat                           | 34 | 36 | 34 | 0.92 (0.66-1.29) | 0.63            |
| Independent                        | 30 | 29 | 29 | 0.96 (0.67-1.39) | 0.84            |
| Something else                     | 10 | 9  | 11 | 1.17 (0.72-1.92) | 0.52            |
| Physical health (good vs not good) | 84 | 84 | 84 | 1.00 (0.70-1.43) | 0.98            |

### Affirmative Responses to Survey Items

<sup>c</sup>

#### *COVID-19 Disease*

|                                             |    |    |    |                  |             |
|---------------------------------------------|----|----|----|------------------|-------------|
| How likely do you think it is that you will |    |    |    |                  |             |
| have COVID-19 over the next year?           | 20 | 18 | 21 | 1.24 (0.86-1.78) | 0.26        |
| When indoors in a crowded setting do you    | 80 | 83 | 76 | 0.67 (0.48-0.92) | <b>0.01</b> |

(or would you) wear a mask?

I am concerned that I or my

family/friends will be exposed when

others do not wear masks in public.

61

64

56

0.69 (0.53-0.91)

**0.01**

#### *COVID-19 Vaccine*

How important do you think a COVID-19

vaccine is to stop the spread of infection

in the US?

82

87

72

0.37 (0.27-0.52)

**<0.01**

Are you worried that the COVID-19

vaccine is not safe for adults?

26

20

37

2.29 (1.72-3.05)

**<0.01**

Have you discussed getting vaccinated

with your healthcare provider?

36

37

37

0.99 (0.75-1.30)

0.94

Of those who have: the provider

encouraged getting the vaccine.

70

74

59

0.51 (0.33-0.80)

**<0.01**

#### *COVID-19 in Children*

COVID-19 can be a serious disease for

some children.

86

88

83

0.64 (0.45-0.93)

**0.02**

I am concerned about the safety of

COVID-19 vaccine in children.

62

58

73

1.95 (1.46-2.60)

**<0.01**

Vaccinating children against COVID-19 is

important to end the pandemic and get

back to normal.

71

76

58

0.44 (0.33-0.58)

**<0.01**

It is better for children to develop

immunity to COVID-19 by getting sick

rather than by getting a shot.

29

23

46

2.92 (2.22-3.85)

**<0.01**

COVID-19 in children is no worse than a

32

28

40

1.72 (1.31-2.26)

**<0.01**

cold or the flu.

*Vaccines Other than COVID-19*

|                                      |    |    |    |                  |                 |
|--------------------------------------|----|----|----|------------------|-----------------|
| Had flu vaccination, past 12 months. | 55 | 60 | 44 | 0.54 (0.41-0.70) | <b>&lt;0.01</b> |
|--------------------------------------|----|----|----|------------------|-----------------|

Of parents: Have you ever delayed having your child get a shot other than the flu for reasons other than illness or allergy?

|    |    |    |                  |             |
|----|----|----|------------------|-------------|
| 16 | 12 | 24 | 2.28 (1.21-4.29) | <b>0.01</b> |
|----|----|----|------------------|-------------|

Of parents: Have you ever decided not to have your child get a shot other than the flu for reasons other than illness or

|          |    |   |    |                  |      |
|----------|----|---|----|------------------|------|
| allergy? | 11 | 9 | 13 | 1.56 (0.72-3.37) | 0.26 |
|----------|----|---|----|------------------|------|

Have you or anyone you know ever had a serious reaction to a vaccine?

|   |   |    |                  |      |
|---|---|----|------------------|------|
| 8 | 7 | 10 | 1.38 (0.89-2.15) | 0.15 |
|---|---|----|------------------|------|

*Healthcare and Science in General*

Received high quality care from healthcare provider, past 12 months.

|    |    |    |                  |                 |
|----|----|----|------------------|-----------------|
| 91 | 93 | 87 | 0.48 (0.31-0.74) | <b>&lt;0.01</b> |
|----|----|----|------------------|-----------------|

In general, would you say that you trust science?

|    |    |    |                  |      |
|----|----|----|------------------|------|
| 90 | 91 | 88 | 0.73 (0.47-1.14) | 0.16 |
|----|----|----|------------------|------|

*Among Vaccinated: Boosters<sup>j</sup>*

If the CDC were to recommend a booster dose so your body can continue to protect you against COVID-19, how likely are you to get one? <sup>i</sup>

|    |    |    |                  |                 |
|----|----|----|------------------|-----------------|
| 87 | 75 | 12 | 0.52 (0.35-0.79) | <b>&lt;0.01</b> |
|----|----|----|------------------|-----------------|

*Of Unvaccinated: Mandates and Incentives<sup>i</sup>*

Of employed: If my employer required me

|    |    |    |                  |      |
|----|----|----|------------------|------|
| 14 | 16 | 17 | 1.01 (0.44-2.33) | 0.99 |
|----|----|----|------------------|------|

to get the COVID-19 vaccine... I would  
get vaccinated. <sup>i</sup>

Of those who would not:

|                                             |    |    |    |                  |             |
|---------------------------------------------|----|----|----|------------------|-------------|
| I would quit my job. <sup>i</sup>           | 29 | 24 | 37 | 1.81 (0.87-3.77) | 0.11        |
| I would protest. <sup>i</sup>               | 32 | 26 | 33 | 1.38 (0.68-2.82) | 0.37        |
| I would consider legal action. <sup>i</sup> | 43 | 36 | 53 | 2.00 (1.03-3.90) | <b>0.04</b> |
| I am not sure what I would do. <sup>i</sup> | 42 | 50 | 38 | 0.61 (0.31-1.19) | 0.14        |

If I was offered a \$25-\$100 gift card for  
getting fully vaccinated... I would be more  
likely to get vaccinated. <sup>i</sup>

|   |   |   |                  |      |
|---|---|---|------------------|------|
| 5 | 7 | 4 | 0.51 (0.15-1.76) | 0.28 |
|---|---|---|------------------|------|

If I was automatically enrolled in a lottery  
when I got fully vaccinated that made me  
eligible to win at least \$100K... I would be  
more likely to get vaccinated. <sup>i</sup>

|   |   |   |                  |      |
|---|---|---|------------------|------|
| 6 | 6 | 8 | 1.37 (0.53-3.54) | 0.51 |
|---|---|---|------------------|------|

Seeing fewer people wear masks in public  
makes me more likely to get vaccinated. <sup>i</sup>

|    |    |    |                  |      |
|----|----|----|------------------|------|
| 13 | 12 | 17 | 1.47 (0.73-2.98) | 0.28 |
|----|----|----|------------------|------|

*Of Unvaccinated: Knowledge and Decision-  
Making re: COVID-19 Vaccination <sup>i</sup>*

I am knowledgeable about COVID-19  
vaccines for adults. <sup>i</sup>

|    |    |    |                  |      |
|----|----|----|------------------|------|
| 75 | 76 | 78 | 1.07 (0.57-1.99) | 0.83 |
|----|----|----|------------------|------|

I still have many unanswered questions  
about COVID-19 vaccines for adults. <sup>i</sup>

|    |    |    |                  |      |
|----|----|----|------------------|------|
| 68 | 70 | 67 | 0.87 (0.51-1.49) | 0.62 |
|----|----|----|------------------|------|

I still cannot decide whether getting the  
COVID-19 vaccine is best for me. <sup>i</sup>

|    |    |    |                  |      |
|----|----|----|------------------|------|
| 47 | 53 | 46 | 0.76 (0.46-1.26) | 0.28 |
|----|----|----|------------------|------|

Talking with other people is important in  
helping me make up my mind about  
COVID-19 vaccination for myself. <sup>i</sup>

|    |    |    |                  |      |
|----|----|----|------------------|------|
| 35 | 37 | 35 | 0.92 (0.54-1.55) | 0.74 |
|----|----|----|------------------|------|

*Of Unvaccinated: Specific Concerns and Other*

*Reasons For Not Getting a COVID-19*

*Vaccine<sup>i</sup>*

|                                                                                                        |    |    |    |                  |      |
|--------------------------------------------------------------------------------------------------------|----|----|----|------------------|------|
| How fast COVID-19 vaccines were developed and made available to the public. <sup>i</sup>               | 59 | 60 | 56 | 0.84 (0.51-1.40) | 0.51 |
| COVID-19 vaccines are new. <sup>i</sup>                                                                | 80 | 82 | 78 | 0.80 (0.43-1.47) | 0.47 |
| The safety of COVID-19 vaccines has not been studied for a long enough period of time. <sup>i</sup>    | 83 | 83 | 78 | 0.72 (0.38-1.36) | 0.31 |
| A lot of people who get the vaccine feel tired, achy and get headaches and fever. <sup>i</sup>         | 74 | 73 | 75 | 1.10 (0.62-1.97) | 0.75 |
| Some people have had allergic reactions to COVID-19 vaccines. <sup>i</sup>                             | 77 | 75 | 81 | 1.41 (0.76-2.63) | 0.28 |
| I am not sure the ingredients in COVID-19 vaccines are safe. <sup>i</sup>                              | 76 | 78 | 71 | 0.69 (0.39-1.21) | 0.19 |
| COVID-19 vaccines might change my genes or DNA (cause mutations). <sup>i</sup>                         | 33 | 30 | 36 | 1.32 (0.78-2.23) | 0.30 |
| COVID-19 vaccines might affect my fertility or ability to have children. <sup>i</sup>                  | 34 | 29 | 36 | 1.37 (0.80-2.33) | 0.25 |
| There were not enough people of my race/ethnicity who were a part of the vaccine studies. <sup>i</sup> | 16 | 16 | 19 | 1.19 (0.62-2.29) | 0.59 |
| They are experimenting on people with the COVID-19 vaccine. <sup>i</sup>                               | 69 | 70 | 66 | 0.82 (0.48-1.41) | 0.48 |
| The drug companies are making a lot of money off of COVID-19 vaccines. <sup>i</sup>                    | 70 | 70 | 69 | 0.95 (0.55-1.65) | 0.86 |

|                                                                                                                                                               |    |    |    |                  |             |
|---------------------------------------------------------------------------------------------------------------------------------------------------------------|----|----|----|------------------|-------------|
| Some COVID-19 vaccines are made from aborted fetuses. <sup>i</sup>                                                                                            | 23 | 18 | 32 | 2.11 (1.19-3.75) | <b>0.01</b> |
| I have a health condition that might make me at increased risk of having a bad reaction to the COVID-19 vaccine. <sup>i</sup>                                 | 29 | 26 | 38 | 1.78 (1.05-3.02) | <b>0.03</b> |
| I have a health condition that would prevent the COVID-19 vaccine from being effective. <sup>i</sup>                                                          | 16 | 16 | 20 | 1.35 (0.72-2.51) | 0.34        |
| I am worried about severe vaccine side effects such as myocarditis (heart swelling), Guillain Barre Syndrome (paralysis), or severe blood clots. <sup>i</sup> | 74 | 75 | 75 | 1.04 (0.58-1.86) | 0.90        |
| Vaccine recommendations are influenced more by politics than by science. <sup>i</sup>                                                                         | 83 | 80 | 86 | 1.52 (0.79-2.93) | 0.21        |
| I am worried about the safety of COVID-19 vaccines. <sup>i</sup>                                                                                              | 86 | 85 | 87 | 1.20 (0.59-2.45) | 0.61        |
| I do not trust how quickly the COVID-19 vaccine was developed. <sup>i</sup>                                                                                   | 86 | 86 | 88 | 1.18 (0.59-2.37) | 0.64        |
| I worry that I would have a reaction to the vaccine. <sup>i</sup>                                                                                             | 78 | 79 | 81 | 1.15 (0.61-2.13) | 0.67        |
| I worry about having to provide personal information (name, address, phone number, insurance card) to get the vaccine. <sup>i</sup>                           | 26 | 24 | 28 | 1.20 (0.68-2.11) | 0.52        |
| Those I trust (friends, family, or religious leaders) do not want to get the vaccine. <sup>i</sup>                                                            | 53 | 50 | 59 | 1.40 (0.85-2.32) | 0.19        |
| I have seen posts on social media that make me wary of the vaccine. <sup>i</sup>                                                                              | 51 | 53 | 50 | 0.89 (0.54-1.47) | 0.64        |



|                                                                                                                          |    |    |    |                   |      |
|--------------------------------------------------------------------------------------------------------------------------|----|----|----|-------------------|------|
| I want to wait to see what happens to others who are vaccinated. <sup>i</sup>                                            | 73 | 75 | 73 | 0.90 (0.51-1.58)  | 0.71 |
| I need more time to learn and think more about it. <sup>i</sup>                                                          | 59 | 64 | 56 | 0.73 (0.44-1.21)  | 0.22 |
| Of pregnant women: I do not think the COVID-19 vaccine is safe for me or my baby. <sup>i</sup>                           | 39 | 37 | 64 | 3.09 (0.55-17.48) | 0.19 |
| <i>Of Unvaccinated: Reasons to Get COVID-19 Vaccination <sup>i</sup></i>                                                 |    |    |    |                   |      |
| COVID-19 vaccines are likely to protect me from the COVID-19 strains circulating. <sup>i</sup>                           | 24 | 28 | 21 | 0.71 (0.40-1.25)  | 0.23 |
| COVID-19 vaccines are likely to protect me from new variants of COVID-19 that may appear in the future. <sup>i</sup>     | 22 | 25 | 23 | 0.91 (0.50-1.65)  | 0.76 |
| It's important for me to get vaccinated so I don't accidentally give COVID-19 to other people in my family. <sup>i</sup> | 21 | 24 | 20 | 0.81 (0.43-1.53)  | 0.52 |
| It's important for me to get vaccinated to help get my community back to normal. <sup>i</sup>                            | 17 | 19 | 17 | 0.91 (0.48-1.73)  | 0.78 |
| The government is acting in my or my family's best interest when it comes to COVID-19. <sup>i</sup>                      | 18 | 20 | 21 | 1.05 (0.58-1.91)  | 0.87 |
| <i>Of Unvaccinated: Barriers to COVID-19 Vaccination <sup>i</sup></i>                                                    |    |    |    |                   |      |
| I cannot get transportation to where                                                                                     | 5  | 6  | 1  | 0.16 (0.02-1.26)  | 0.05 |

COVID-19 vaccines are being given. <sup>i</sup>

The times when COVID-19 vaccines are  
being given conflict with my daily  
schedule. <sup>i</sup>

12 13 9 0.68 (0.29-1.60) 0.38

I do not know how to register to get a  
vaccine appointment. <sup>i</sup>

11 11 9 0.76 (0.31-1.89) 0.56

I know how to register to get a vaccine  
appointment but it is too difficult. <sup>i</sup>

14 13 16 1.26 (0.63-2.52) 0.52

I cannot miss work to get vaccinated. <sup>i</sup>

18 18 21 1.22 (0.63-2.36) 0.56

At least one of the above. <sup>i</sup>

34 32 36 1.16 (0.68-1.98) 0.59

#### *Political Activities and Support*

People may be involved in civic and  
political activities. In the past 12 months,  
have you...

Attended a political protest or rally

7 7 5 0.81 (0.47-1.41) 0.46

Contacted a government official

15 15 14 0.89 (0.6-1.31) 0.54

Volunteered or worked for a Presidential  
campaign

3 3 3 1.03 (0.45-2.39) 0.94

Volunteered or worked for a political  
candidate other than a Presidential  
campaign

2 3 2 0.65 (0.22-1.88) 0.42

Volunteered or worked for a political  
party, issue, or cause

4 4 2 0.49 (0.24-1.00) 0.05

Served on a committee for a civic, non-  
profit or community organization

5 5 7 1.38 (0.78-2.42) 0.27

Written a letter or email to a  
newspaper/magazine or called a live

4 5 4 0.78 (0.36-1.70) 0.53

|                                                                                    |    |    |    |                   |      |
|------------------------------------------------------------------------------------|----|----|----|-------------------|------|
| radio or TV show                                                                   |    |    |    |                   |      |
| Commented about politics on a message board or internet site                       | 19 | 20 | 19 | 0.95 (0.68-1.32)  | 0.74 |
| Shared your opinion about a town or community issue at a public meeting            | 4  | 4  | 5  | 1.12 (0.59-2.13)  | 0.74 |
| Held a publicly elected office                                                     | <1 | <1 | <1 | 1.11 (0.19-6.58)  | 0.91 |
| Signed a petition                                                                  | 26 | 26 | 25 | 0.94 (0.70-1.28)  | 0.71 |
| Ran for a publicly elected office                                                  | <1 | <1 | 0  |                   | 0.34 |
| None of these                                                                      | 60 | 60 | 63 | 1.10 (0.84-1.44)  | 0.49 |
| Do you identify with or actively support any of the following political movements? |    |    |    |                   |      |
| Tea Party (Taxed Enough Already)                                                   | 6  | 6  | 5  | 0.77 (0.43-1.39)  | 0.38 |
| Environmental Rights                                                               | 20 | 20 | 19 | 0.89 (0.64-1.25)  | 0.51 |
| Women's Rights/ Me Too                                                             | 23 | 24 | 23 | 0.93 (0.68-1.27)  | 0.65 |
| Racial Equality                                                                    | 26 | 27 | 24 | 0.87 (0.64-1.17)  | 0.35 |
| Right to Life                                                                      | 15 | 14 | 17 | 1.25 (0.87-1.80)  | 0.22 |
| Peace/Anti-War                                                                     | 11 | 11 | 12 | 1.08 (0.72-1.64)  | 0.70 |
| Lesbian, Gay, Bisexual, Transgender, Queer (LGBTQ) Rights                          | 19 | 20 | 18 | 0.89 (0.62-1.26)  | 0.50 |
| Indivisible                                                                        | 2  | 2  | 2  | 0.94 (0.39-2.26)  | 0.89 |
| Black Lives Matter                                                                 | 25 | 25 | 26 | 1.07 (0.78-1.45)  | 0.69 |
| Men's Rights                                                                       | 4  | 5  | 3  | 0.61 (0.29-1.30)  | 0.20 |
| Alt-right                                                                          | 1  | 0  | 1  | 2.49 (0.63-9.80)  | 0.18 |
| Boogaloo movement                                                                  | 0  | 0  | 1  | 4.71 (0.48-45.94) | 0.14 |
| Antifa                                                                             | 2  | 2  | 2  | 0.81 (0.33-2.00)  | 0.65 |
| QAnon                                                                              | 1  | 1  | 1  | 1.22 (0.27-5.55)  | 0.80 |
| Anti-gun violence                                                                  | 16 | 17 | 14 | 0.79 (0.55-1.14)  | 0.21 |
| None of these                                                                      | 53 | 52 | 54 | 1.08 (0.83-1.41)  | 0.57 |

Do you identify with or actively support  
any of the following organizations?

|                                                                         |    |    |    |                  |      |
|-------------------------------------------------------------------------|----|----|----|------------------|------|
| National Rifle Association (NRA)                                        | 13 | 11 | 15 | 1.37 (0.94-2.01) | 0.10 |
| Heritage Foundation                                                     | 3  | 3  | 3  | 0.85 (0.40-1.78) | 0.66 |
| Planned Parenthood                                                      | 19 | 20 | 18 | 0.90 (0.64-1.26) | 0.53 |
| National Right to Life Committee                                        | 5  | 5  | 4  | 0.91 (0.50-1.65) | 0.76 |
| Greenpeace                                                              | 6  | 6  | 6  | 0.95 (0.54-1.67) | 0.87 |
| Sierra Club                                                             | 8  | 8  | 5  | 0.58 (0.31-1.09) | 0.09 |
| Amnesty International                                                   | 6  | 6  | 5  | 0.83 (0.46-1.49) | 0.52 |
| National Education Association<br>Foundation                            | 6  | 7  | 7  | 0.98 (0.58-1.67) | 0.95 |
| American Civil Liberties Union (ACLU)                                   | 12 | 12 | 12 | 0.96 (0.64-1.45) | 0.86 |
| Americans for Prosperity                                                | 1  | 1  | 2  | 2.25 (0.83-6.09) | 0.10 |
| MoveOn.org                                                              | 7  | 7  | 6  | 0.78 (0.47-1.30) | 0.34 |
| The NAACP/National Association for<br>the Advancement of Colored People | 12 | 12 | 14 | 1.16 (0.79-1.69) | 0.45 |
| American Red Cross                                                      | 23 | 23 | 24 | 1.06 (0.77-1.45) | 0.72 |
| Chamber of Commerce                                                     | 3  | 3  | 3  | 0.92 (0.42-2.01) | 0.84 |
| Freedom Caucus                                                          | 2  | 2  | 2  | 1.19 (0.52-2.75) | 0.68 |
| None of these                                                           | 53 | 54 | 53 | 0.95 (0.73-1.23) | 0.69 |

#### *Sources of Health Information*

Which of the following sources have you  
used to look for health and wellness  
related information or education in the  
past 12 months?

|            |    |    |    |                  |      |
|------------|----|----|----|------------------|------|
| Doctor     | 60 | 61 | 57 | 0.84 (0.65-1.10) | 0.21 |
| Pharmacist | 21 | 22 | 19 | 0.82 (0.59-1.14) | 0.23 |

|                                                                                   |    |    |    |                  |             |
|-----------------------------------------------------------------------------------|----|----|----|------------------|-------------|
| Nurse, nurse practitioner or physician's assistant                                | 29 | 29 | 29 | 0.97 (0.73-1.30) | 0.86        |
| Relative, friend or co-worker                                                     | 23 | 23 | 26 | 1.19 (0.87-1.63) | 0.27        |
| Someone you know who has a particular medical condition                           | 8  | 8  | 11 | 1.43 (0.93-2.20) | 0.10        |
| Disease-related association or society                                            | 5  | 6  | 5  | 0.85 (0.46-1.58) | 0.60        |
| Patient support group or foundation                                               | 2  | 2  | 2  | 1.19 (0.49-2.86) | 0.70        |
| Educational forum at a local clinic, hospital, community center or other location | 3  | 4  | 3  | 0.81 (0.38-1.71) | 0.57        |
| Pharmaceutical company                                                            | 1  | 1  | 2  | 2.15 (0.86-5.37) | 0.09        |
| Health insurance company                                                          | 7  | 7  | 7  | 0.98 (0.61-1.60) | 0.95        |
| Newspapers or magazines                                                           | 7  | 6  | 7  | 1.17 (0.71-1.94) | 0.54        |
| Television                                                                        | 6  | 6  | 7  | 1.06 (0.66-1.70) | 0.80        |
| The internet                                                                      | 48 | 47 | 51 | 1.16 (0.90-1.51) | 0.26        |
| Social Media (such as Facebook, Twitter)                                          | 6  | 5  | 8  | 1.72 (1.03-2.88) | <b>0.04</b> |
| Healthcare app for smartphone or tablet                                           | 6  | 6  | 6  | 1.10 (0.64-1.88) | 0.74        |
| Have not looked for information in the past 12 months                             | 21 | 21 | 20 | 0.98 (0.70-1.35) | 0.89        |

*Barriers, Specific Concerns and Other Reasons*

*For Not Getting the Flu Vaccine*

Of those who did not get a flu shot this past year: this is because...<sup>i</sup>

|                                  |    |    |    |                  |      |
|----------------------------------|----|----|----|------------------|------|
| The flu is not a serious illness | 9  | 8  | 10 | 1.33 (0.66-2.65) | 0.42 |
| I'm healthy                      | 22 | 23 | 20 | 0.88 (0.55-1.40) | 0.58 |
| I just didn't think about it     | 22 | 24 | 17 | 0.65 (0.41-1.05) | 0.08 |

|                                                            |    |    |    |                  |             |
|------------------------------------------------------------|----|----|----|------------------|-------------|
| I didn't know where to get it                              | 1  | 1  | 0  | 0.29 (0.03-2.49) | 0.23        |
| I didn't have health insurance                             | 3  | 3  | 3  | 0.87 (0.36-2.10) | 0.75        |
| I didn't have time                                         | 5  | 6  | 5  | 0.76 (0.32-1.82) | 0.54        |
| I don't believe in vaccines                                | 6  | 5  | 8  | 1.72 (0.85-3.50) | 0.13        |
| I'm afraid of the side effects                             | 11 | 10 | 12 | 1.18 (0.65-2.15) | 0.58        |
| I'm afraid of needles                                      | 4  | 4  | 4  | 0.79 (0.33-1.89) | 0.59        |
| I prefer alternative (homeopathic)<br>medicine to vaccines | 11 | 10 | 9  | 0.93 (0.47-1.84) | 0.83        |
| I have never had the flu                                   | 13 | 14 | 9  | 0.60 (0.31-1.15) | 0.12        |
| The vaccine will make me sick with the<br>flu              | 9  | 8  | 14 | 1.78 (1.01-3.13) | <b>0.04</b> |
| I got a flu shot the year before so I<br>didn't need it    | 2  | 2  | 5  | 3.56 (1.29-9.82) | <b>0.01</b> |
| Another reason                                             | 27 | 25 | 31 | 1.35 (0.89-2.05) | 0.16        |

Red text indicates survey items reflecting negative vaccine attitudes

<sup>a</sup> Column percentages (of total sample), weighted according to survey weights to achieve national representativeness

<sup>b</sup> Column percentages (of diagnosis categories) (except for first row "All" which is a row percentage), weighted according to survey weights to achieve national representativeness

<sup>c</sup> using the Pearson chi-square test at significance level of  $\alpha=5\%$ ; bold indicates statistical significance ( $p<0.05$ ). For non-dichotomous categorical variables, p-values for differences between all categories included in top row with variable name, and p-values for differences between individual categories and reference category included in individual category row.

<sup>d</sup> Construct scales combine scores for each relevant survey item (reversing negative items) and divide by maximum (e.g., 100 being complete trust and 0 being complete distrust); after dichotomizing at median, binary variable represents high vs low score (e.g., 1 being high trust and 0 being low trust)

<sup>e</sup> Likert scale response options (strongly agree, agree, disagree, strongly disagree, don't know) dichotomized to agree/disagree (don't know coded as disagree), results for agreement shown; other scale response options dichotomized to reflect affirmative/negative, results for affirmative shown

<sup>f</sup> Odds Ratio (95% Confidence Interval) of being diagnosed with COVID-19 ever vs never for affirmative survey response vs not

<sup>i</sup> asked only to unvaccinated respondents

<sup>j</sup> asked only to vaccinated respondents

<sup>k</sup> Reference category for logistic regression of categorical variables
