# Supplementary material for: COVID-19 Vaccination Status, Attitudes, and Values among US Adults in September 2021
Source: MDPI journal article supplement (doi:10.3390/jcm11133734), 2022-06-28
Supplement: s1 [file s1]

**Table S2. Frequency and Odds of Hesitation Before Getting COVID-19 Vaccine among Vaccinated by Vaccine Attitudes, Trust in CDC and HDs, and Sociodemographic Characteristics**

*Numbers in the "Total" column indicate the percentage of the vaccinated weighted sample providing the September 2021 survey response in each row. Numbers in the "Hesitation Prior to Vaccination" columns indicate the percentage of those whose amount of hesitation prior to receiving the COVID-19 vaccine match that of the column header who provided the survey response in each row. The numbers in the "OR (95%CI)" columns indicate the Odds Ratio comparing the different amounts of hesitation matching that of the column header by the survey response in each row. The numbers in the "P-value" columns indicate the p-value of the associations described in the columns to the left, boldface indicating statistical significance ( $p < 0.05$ ).*

| Survey Items                                                     | Hesitation Prior to                     |                             |      |       | No Hesitation vs. Some   |                          | No Hesitation vs. A Lot of |                         |                          |
|------------------------------------------------------------------|-----------------------------------------|-----------------------------|------|-------|--------------------------|--------------------------|----------------------------|-------------------------|--------------------------|
|                                                                  | Total<br>Vaccinated<br>(%) <sup>a</sup> | Vaccination, % <sup>b</sup> |      |       | Hesitation               |                          | Hesitation                 |                         |                          |
|                                                                  |                                         | None                        | Some | A Lot | p-<br>value <sup>c</sup> | p-<br>value <sup>c</sup> | p-<br>value <sup>c</sup>   | OR (95%CI) <sup>i</sup> | p-<br>value <sup>c</sup> |
|                                                                  |                                         |                             |      |       |                          |                          |                            |                         |                          |
| All                                                              | 100                                     | 65                          | 24   | 11    |                          |                          |                            |                         |                          |
| <b>Constructs <sup>d</sup></b>                                   |                                         |                             |      |       |                          |                          |                            |                         |                          |
| Confidence in vaccines                                           | 79                                      | 94                          | 65   | 27    | <b>&lt;0.01</b>          | 8.70 (5.97-12.67)        | <b>&lt;0.01</b>            | 43.09 (26.97-68.86)     | <b>&lt;0.01</b>          |
| Trust in the Centers for Disease Control and<br>Prevention (CDC) | 58                                      | 70                          | 42   | 23    | <b>&lt;0.01</b>          | 3.20 (2.45-4.18)         | <b>&lt;0.01</b>            | 7.53 (5.05-11.22)       | <b>&lt;0.01</b>          |
| Trust in local and state health departments<br>(HDs)             | 55                                      | 64                          | 44   | 25    | <b>&lt;0.01</b>          | 2.28 (1.75-2.96)         | <b>&lt;0.01</b>            | 5.28 (3.61-7.72)        | <b>&lt;0.01</b>          |

**Sociodemographic Characteristics**

|                      |    |    |    |    |                  |                 |                  |                 |  |
|----------------------|----|----|----|----|------------------|-----------------|------------------|-----------------|--|
| Gender               |    |    |    |    | <b>0.01</b>      |                 |                  |                 |  |
| Female               | 51 | 48 | 55 | 59 | ref <sup>k</sup> |                 | ref <sup>k</sup> |                 |  |
| Male                 | 49 | 52 | 45 | 41 | 1.31 (1.01-1.70) | <b>0.04</b>     | 1.55 (1.09-2.21) | <b>0.01</b>     |  |
| Age (years)          |    |    |    |    | <b>&lt;0.01</b>  |                 |                  |                 |  |
| 18-29                | 17 | 16 | 22 | 16 | ref <sup>k</sup> |                 | ref <sup>k</sup> |                 |  |
| 30-44                | 23 | 21 | 27 | 31 | 1.03 (0.67-1.60) | 0.88            | 0.65 (0.36-1.20) | 0.17            |  |
| 45-59                | 25 | 24 | 26 | 30 | 1.26 (0.82-1.93) | 0.29            | 0.76 (0.42-1.37) | 0.36            |  |
| 60+                  | 35 | 40 | 26 | 23 | 2.10 (1.39-3.17) | <b>&lt;0.01</b> | 1.69 (0.93-3.07) | 0.08            |  |
| Education (attained) |    |    |    |    | <b>&lt;0.01</b>  |                 |                  |                 |  |
| <High School         | 8  | 7  | 10 | 12 | ref <sup>k</sup> |                 | ref <sup>k</sup> |                 |  |
| High School          | 25 | 22 | 29 | 32 | 1.15 (0.69-1.90) | 0.59            | 1.24 (0.66-2.32) | 0.50            |  |
| Some College         | 27 | 27 | 27 | 28 | 1.54 (0.94-2.54) | 0.09            | 1.77 (0.96-3.28) | 0.07            |  |
| Bachelors or Higher  | 40 | 45 | 34 | 28 | 2.05 (1.26-3.34) | <b>&lt;0.01</b> | 2.87 (1.55-5.32) | <b>&lt;0.01</b> |  |
| Race/Ethnicity       |    |    |    |    | <b>&lt;0.01</b>  |                 |                  |                 |  |
| White, non-Hispanic  | 63 | 67 | 54 | 62 | ref <sup>k</sup> |                 | ref <sup>k</sup> |                 |  |
| Black, non-Hispanic  | 11 | 8  | 15 | 17 | 0.43 (0.31-0.58) | <b>&lt;0.01</b> | 0.42 (0.27-0.64) | <b>&lt;0.01</b> |  |
| Hispanic             | 17 | 16 | 20 | 15 | 0.65 (0.48-0.87) | <b>&lt;0.01</b> | 1.00 (0.66-1.51) | 0.99            |  |

|                                                           |    |    |    |    |                 |                  |                 |                  |                 |
|-----------------------------------------------------------|----|----|----|----|-----------------|------------------|-----------------|------------------|-----------------|
| Other, non-Hispanic                                       | 10 | 10 | 11 | 6  |                 | 0.69 (0.40-1.19) | 0.18            | 1.49 (0.62-3.61) | 0.37            |
| Region                                                    |    |    |    |    | 0.24            |                  |                 |                  |                 |
| Northeast                                                 | 18 | 18 | 17 | 24 |                 | ref <sup>k</sup> |                 | ref <sup>k</sup> |                 |
| Midwest                                                   | 20 | 21 | 18 | 24 |                 | 1.13 (0.72-1.75) | 0.60            | 1.16 (0.69-1.94) | 0.58            |
| South                                                     | 37 | 36 | 39 | 34 |                 | 0.90 (0.62-1.31) | 0.59            | 1.42 (0.88-2.27) | 0.15            |
| West                                                      | 25 | 25 | 25 | 18 |                 | 0.97 (0.65-1.47) | 0.90            | 1.84 (1.08-3.14) | <b>0.02</b>     |
| Metropolitan Statistical Area status (metro vs non-metro) | 88 | 89 | 88 | 85 | 0.42            | 1.10 (0.71-1.71) | 0.66            | 1.43 (0.84-2.43) | 0.19            |
| Employment status (working vs not working)                | 61 | 58 | 65 | 65 | 0.05            | 0.75 (0.57-0.98) | <b>0.03</b>     | 0.75 (0.52-1.08) | 0.12            |
| Household income                                          |    |    |    |    | <b>&lt;0.01</b> |                  |                 |                  |                 |
| <\$50k                                                    | 26 | 22 | 35 | 31 |                 | ref <sup>k</sup> |                 | ref <sup>k</sup> |                 |
| \$50-85k                                                  | 31 | 30 | 31 | 39 |                 | 1.52 (1.10-2.10) | <b>0.01</b>     | 1.08 (0.71-1.64) | 0.73            |
| \$85-150k                                                 | 19 | 20 | 15 | 19 |                 | 2.13 (1.43-3.18) | <b>&lt;0.01</b> | 1.50 (0.89-2.51) | 0.13            |
| \$150k+                                                   | 23 | 27 | 18 | 11 |                 | 2.38 (1.63-3.47) | <b>&lt;0.01</b> | 3.55 (1.95-6.45) | <b>&lt;0.01</b> |
| Household size                                            |    |    |    |    | <b>0.04</b>     |                  |                 |                  |                 |
| 1                                                         | 18 | 18 | 16 | 19 |                 | ref <sup>k</sup> |                 | ref <sup>k</sup> |                 |

|                                    |    |    |    |    |                 |                  |                 |                  |                 |
|------------------------------------|----|----|----|----|-----------------|------------------|-----------------|------------------|-----------------|
| 2                                  | 38 | 40 | 33 | 39 |                 | 1.13 (0.77-1.66) | 0.52            | 1.11 (0.69-1.78) | 0.67            |
| 3                                  | 18 | 19 | 18 | 15 |                 | 1.00 (0.65-1.54) | 0.99            | 1.44 (0.79-2.62) | 0.24            |
| 4+                                 | 26 | 23 | 33 | 27 |                 | 0.66 (0.44-0.98) | <b>0.04</b>     | 0.94 (0.56-1.59) | 0.83            |
| Number of children (ages 2-17)     |    |    |    |    | <b>&lt;0.01</b> |                  |                 |                  |                 |
| 0                                  | 76 | 79 | 68 | 76 |                 | ref <sup>k</sup> |                 | ref <sup>k</sup> |                 |
| 1                                  | 10 | 9  | 11 | 12 |                 | 0.65 (0.43-0.99) | <b>0.04</b>     | 0.68 (0.39-1.20) | 0.18            |
| 2                                  | 10 | 9  | 13 | 8  |                 | 0.59 (0.39-0.90) | <b>0.02</b>     | 1.05 (0.55-2.00) | 0.88            |
| 3+                                 | 5  | 4  | 8  | 4  |                 | 0.40 (0.24-0.68) | <b>&lt;0.01</b> | 0.87 (0.39-1.96) | 0.74            |
| Political affiliation              |    |    |    |    | <b>&lt;0.01</b> |                  |                 |                  |                 |
| Republican                         | 24 | 20 | 27 | 35 |                 | ref <sup>k</sup> |                 | ref <sup>k</sup> |                 |
| Democrat                           | 39 | 45 | 32 | 22 |                 | 1.83 (1.31-2.57) | <b>&lt;0.01</b> | 3.40 (2.13-5.42) | <b>&lt;0.01</b> |
| Independent                        | 29 | 29 | 29 | 26 |                 | 1.31 (0.91-1.88) | 0.15            | 1.93 (1.22-3.05) | <b>0.01</b>     |
| Something else                     | 8  | 6  | 11 | 17 |                 | 0.75 (0.45-1.25) | 0.27            | 0.63 (0.35-1.12) | 0.12            |
| Physical health (good vs not good) | 84 | 86 | 82 | 78 | <b>0.04</b>     | 1.3 (0.93-1.82)  | 0.12            | 1.67 (1.09-2.55) | <b>0.02</b>     |

#### Affirmative Responses to Survey Items <sup>c</sup>

*COVID-19 Disease*

|                                                                                                     |    |    |    |    |                 |                   |                 |                      |                 |
|-----------------------------------------------------------------------------------------------------|----|----|----|----|-----------------|-------------------|-----------------|----------------------|-----------------|
| Have you ever had COVID-19?                                                                         | 15 | 13 | 17 | 22 | <b>0.01</b>     | 0.72 (0.50-1.05)  | 0.09            | 0.53 (0.34-0.84)     | <b>0.01</b>     |
| How likely do you think it is that you will have COVID-19 over the next year?                       | 18 | 18 | 18 | 22 | 0.47            | 0.95 (0.68-1.33)  | 0.76            | 0.76 (0.49-1.18)     | 0.23            |
| When indoors in a crowded setting do you (or would you) wear a mask?                                | 86 | 88 | 86 | 79 | <b>0.03</b>     | 1.12 (0.76-1.64)  | 0.56            | 1.85 (1.17-2.93)     | <b>0.01</b>     |
| I am concerned that I or my family/friends will be exposed when others do not wear masks in public. | 68 | 75 | 61 | 43 | <b>&lt;0.01</b> | 1.94 (1.46-2.57)  | <b>&lt;0.01</b> | 4.11 (2.85-5.93)     | <b>&lt;0.01</b> |
| <i>COVID-19 Vaccine</i>                                                                             |    |    |    |    |                 |                   |                 |                      |                 |
| How important do you think a COVID-19 vaccine is to stop the spread of infection in the US?         | 96 | 99 | 96 | 76 | <b>&lt;0.01</b> | 6.21 (2.12-18.18) | <b>&lt;0.01</b> | 44.28 (16.76-116.99) | <b>&lt;0.01</b> |
| Are you worried that the COVID-19 vaccine is not safe for adults?                                   | 11 | 3  | 16 | 50 | <b>&lt;0.01</b> | 0.15 (0.09-0.25)  | <b>&lt;0.01</b> | 0.03 (0.02-0.05)     | <b>&lt;0.01</b> |
| Have you discussed getting vaccinated with your healthcare provider?                                | 39 | 40 | 34 | 36 | 0.14            | 1.30 (0.99-1.70)  | 0.06            | 1.19 (0.83-1.70)     | 0.35            |
| Of those who have: the provider encouraged getting the vaccine.                                     | 79 | 87 | 66 | 52 | <b>&lt;0.01</b> | 3.37 (2.04-5.57)  | <b>&lt;0.01</b> | 5.99 (3.25-11.06)    | <b>&lt;0.01</b> |

### *COVID-19 in Children*

COVID-19 can be a serious disease for some children.

|    |    |    |    |                 |                  |                 |                  |                 |
|----|----|----|----|-----------------|------------------|-----------------|------------------|-----------------|
| 92 | 94 | 89 | 83 | <b>&lt;0.01</b> | 2.00 (1.25-3.19) | <b>&lt;0.01</b> | 3.35 (2.02-5.58) | <b>&lt;0.01</b> |
|----|----|----|----|-----------------|------------------|-----------------|------------------|-----------------|

I am concerned about the safety of COVID-19 vaccine in children.

|    |    |    |    |                 |                  |                 |                  |                 |
|----|----|----|----|-----------------|------------------|-----------------|------------------|-----------------|
| 54 | 41 | 73 | 85 | <b>&lt;0.01</b> | 0.26 (0.19-0.34) | <b>&lt;0.01</b> | 0.12 (0.08-0.19) | <b>&lt;0.01</b> |
|----|----|----|----|-----------------|------------------|-----------------|------------------|-----------------|

Vaccinating children against COVID-19 is important to end the pandemic and get back to normal.

|    |    |    |    |                 |                  |                 |                    |                 |
|----|----|----|----|-----------------|------------------|-----------------|--------------------|-----------------|
| 85 | 93 | 79 | 52 | <b>&lt;0.01</b> | 3.56 (2.43-5.20) | <b>&lt;0.01</b> | 12.53 (8.28-18.96) | <b>&lt;0.01</b> |
|----|----|----|----|-----------------|------------------|-----------------|--------------------|-----------------|

It is better for children to develop immunity to COVID-19 by getting sick rather than by getting a shot.

|    |    |    |    |                 |                  |                 |                  |                 |
|----|----|----|----|-----------------|------------------|-----------------|------------------|-----------------|
| 17 | 10 | 22 | 46 | <b>&lt;0.01</b> | 0.42 (0.29-0.59) | <b>&lt;0.01</b> | 0.14 (0.09-0.20) | <b>&lt;0.01</b> |
|----|----|----|----|-----------------|------------------|-----------------|------------------|-----------------|

COVID-19 in children is no worse than a cold or the flu.

|    |    |    |    |                 |                  |                 |                  |                 |
|----|----|----|----|-----------------|------------------|-----------------|------------------|-----------------|
| 23 | 16 | 30 | 47 | <b>&lt;0.01</b> | 0.45 (0.33-0.61) | <b>&lt;0.01</b> | 0.21 (0.14-0.30) | <b>&lt;0.01</b> |
|----|----|----|----|-----------------|------------------|-----------------|------------------|-----------------|

### *Vaccines Other than COVID-19*

Had flu vaccination, past 12 months.

|    |    |    |    |                 |                  |                 |                  |                 |
|----|----|----|----|-----------------|------------------|-----------------|------------------|-----------------|
| 66 | 75 | 54 | 38 | <b>&lt;0.01</b> | 2.61 (1.99-3.43) | <b>&lt;0.01</b> | 4.96 (3.44-7.14) | <b>&lt;0.01</b> |
|----|----|----|----|-----------------|------------------|-----------------|------------------|-----------------|

Of parents: Have you ever delayed having your child get a shot other than the flu for reasons other than illness or allergy?

|   |   |    |   |      |                  |      |                  |      |
|---|---|----|---|------|------------------|------|------------------|------|
| 9 | 8 | 12 | 9 | 0.53 | 0.63 (0.28-1.43) | 0.27 | 0.83 (0.24-2.86) | 0.77 |
|---|---|----|---|------|------------------|------|------------------|------|

Of parents: Have you ever decided not to have

|   |   |   |    |             |                  |             |                  |             |
|---|---|---|----|-------------|------------------|-------------|------------------|-------------|
| 6 | 3 | 9 | 12 | <b>0.02</b> | 0.31 (0.11-0.81) | <b>0.02</b> | 0.23 (0.07-0.75) | <b>0.02</b> |
|---|---|---|----|-------------|------------------|-------------|------------------|-------------|

your child get a shot other than the flu for  
reasons other than illness or allergy?

Have you or anyone you know ever had a serious  
reaction to a vaccine?

|   |   |   |    |       |                  |      |                  |       |
|---|---|---|----|-------|------------------|------|------------------|-------|
| 4 | 3 | 5 | 12 | <0.01 | 0.46 (0.25-0.85) | 0.01 | 0.19 (0.10-0.37) | <0.01 |
|---|---|---|----|-------|------------------|------|------------------|-------|

#### *Healthcare and Science in General*

Received high quality care from healthcare  
provider, past 12 months.

|    |    |    |    |       |                  |      |                 |       |
|----|----|----|----|-------|------------------|------|-----------------|-------|
| 93 | 95 | 91 | 82 | <0.01 | 1.83 (1.09-3.07) | 0.02 | 4.4 (2.48-7.81) | <0.01 |
|----|----|----|----|-------|------------------|------|-----------------|-------|

In general, would you say that you trust science?

|    |    |    |    |       |                  |       |                   |       |
|----|----|----|----|-------|------------------|-------|-------------------|-------|
| 95 | 98 | 92 | 81 | <0.01 | 4.02 (2.09-7.75) | <0.01 | 10.88 (5.7-20.77) | <0.01 |
|----|----|----|----|-------|------------------|-------|-------------------|-------|

#### *Among Vaccinated: Boosters<sup>j</sup>*

If the CDC were to recommend a booster dose  
so your body can continue to protect you against  
COVID-19, how likely are you to get one?<sup>i</sup>

|    |    |    |    |       |                  |       |                     |       |
|----|----|----|----|-------|------------------|-------|---------------------|-------|
| 87 | 97 | 79 | 46 | <0.01 | 8.1 (5.06-12.98) | <0.01 | 35.86 (21.69-59.31) | <0.01 |
|----|----|----|----|-------|------------------|-------|---------------------|-------|

#### *Political Activities and Support*

People may be involved in civic and political  
activities. In the past 12 months, have you...

|                                       |   |   |   |   |      |                  |      |                  |      |
|---------------------------------------|---|---|---|---|------|------------------|------|------------------|------|
| Attended a political protest or rally | 7 | 9 | 6 | 3 | 0.02 | 1.58 (0.90-2.78) | 0.11 | 3.19 (1.33-7.63) | 0.01 |
|---------------------------------------|---|---|---|---|------|------------------|------|------------------|------|

|                                 |    |    |    |    |       |                  |       |                  |      |
|---------------------------------|----|----|----|----|-------|------------------|-------|------------------|------|
| Contacted a government official | 16 | 19 | 11 | 11 | <0.01 | 1.94 (1.32-2.87) | <0.01 | 1.88 (1.11-3.19) | 0.02 |
|---------------------------------|----|----|----|----|-------|------------------|-------|------------------|------|

|                                                                                     |    |    |    |    |                 |                   |                 |                   |             |
|-------------------------------------------------------------------------------------|----|----|----|----|-----------------|-------------------|-----------------|-------------------|-------------|
| Volunteered or worked for a Presidential campaign                                   | 3  | 4  | 1  | 1  | <b>0.01</b>     | 3.8 (1.51-9.57)   | <b>&lt;0.01</b> | 3.43 (0.77-15.33) | 0.11        |
| Volunteered or worked for a political candidate other than a Presidential campaign  | 3  | 4  | 1  | 2  | <b>0.02</b>     | 4.15 (1.51-11.42) | <b>0.01</b>     | 1.64 (0.56-4.82)  | 0.37        |
| Volunteered or worked for a political party, issue, or cause                        | 4  | 6  | 2  | 2  | <b>&lt;0.01</b> | 3.19 (1.43-7.13)  | <b>&lt;0.01</b> | 3.19 (1.03-9.84)  | 0.04        |
| Served on a committee for a civic, non-profit or community organization             | 6  | 7  | 4  | 3  | <b>0.01</b>     | 1.97 (1.09-3.53)  | <b>0.02</b>     | 2.64 (1.13-6.15)  | <b>0.02</b> |
| Written a letter or email to a newspaper/magazine or called a live radio or TV show | 4  | 4  | 4  | 5  | 0.88            | 1.11 (0.57-2.17)  | 0.76            | 0.87 (0.38-1.98)  | 0.74        |
| Commented about politics on a message board or internet site                        | 20 | 22 | 16 | 17 | <b>0.03</b>     | 1.52 (1.07-2.16)  | <b>0.02</b>     | 1.37 (0.88-2.12)  | 0.16        |
| Shared your opinion about a town or community issue at a public meeting             | 4  | 5  | 4  | 3  | 0.51            | 1.28 (0.71-2.33)  | 0.41            | 1.56 (0.61-3.99)  | 0.35        |
| Held a publicly elected office                                                      | 0  | 1  | 0  | 0  | 0.24            | 4.61 (0.72-29.60) | 0.11            |                   |             |
| Signed a petition                                                                   | 27 | 28 | 25 | 25 | 0.62            | 1.13 (0.84-1.51)  | 0.43            | 1.15 (0.78-1.70)  | 0.47        |
| Ran for a publicly elected office                                                   | 0  | 0  | 0  | 0  | 0.70            | 1.38 (0.17-11.35) | 0.77            |                   |             |
| None of these                                                                       | 59 | 57 | 64 | 63 | <b>0.03</b>     | 0.73 (0.56-0.95)  | <b>0.02</b>     | 0.75 (0.53-1.07)  | 0.12        |



the following political movements?

|                                            |    |    |    |    |                 |                  |                 |                     |                 |
|--------------------------------------------|----|----|----|----|-----------------|------------------|-----------------|---------------------|-----------------|
| Tea Party (Taxed Enough Already)           | 5  | 4  | 7  | 9  | <b>&lt;0.01</b> | 0.49 (0.28-0.86) | <b>0.01</b>     | 0.38 (0.19-0.73)    | <b>&lt;0.01</b> |
| Environmental Rights                       | 23 | 27 | 17 | 10 | <b>&lt;0.01</b> | 1.76 (1.27-2.44) | <b>&lt;0.01</b> | 3.16 (1.92-5.21)    | <b>&lt;0.01</b> |
| Women's Rights/ Me Too                     | 26 | 30 | 21 | 15 | <b>&lt;0.01</b> | 1.61 (1.18-2.20) | <b>&lt;0.01</b> | 2.46 (1.53-3.95)    | <b>&lt;0.01</b> |
| Racial Equality                            | 29 | 32 | 27 | 17 | <b>&lt;0.01</b> | 1.29 (0.97-1.73) | 0.08            | 2.33 (1.51-3.59)    | <b>&lt;0.01</b> |
| Right to Life                              | 12 | 10 | 16 | 17 | <b>&lt;0.01</b> | 0.58 (0.40-0.83) | <b>&lt;0.01</b> | 0.53 (0.33-0.86)    | <b>0.01</b>     |
| Peace/Anti-War                             | 12 | 13 | 14 | 8  | 0.15            | 0.87 (0.60-1.27) | 0.47            | 1.72 (0.89-3.33)    | 0.11            |
| Lesbian, Gay, Bisexual, Transgender, Queer |    |    |    |    |                 |                  |                 |                     |                 |
| (LGBTQ) Rights                             | 22 | 26 | 17 | 13 | <b>&lt;0.01</b> | 1.79 (1.26-2.53) | <b>&lt;0.01</b> | 2.47 (1.48-4.12)    | <b>&lt;0.01</b> |
| Indivisible                                | 2  | 2  | 2  | 0  | 0.15            | 1.06 (0.40-2.85) | 0.90            | 15.33 (2.04-115.29) | <b>0.01</b>     |
| Black Lives Matter                         | 28 | 32 | 23 | 15 | <b>&lt;0.01</b> | 1.61 (1.19-2.17) | <b>&lt;0.01</b> | 2.58 (1.67-4.01)    | <b>&lt;0.01</b> |
| Men's Rights                               | 4  | 4  | 5  | 4  | 0.68            | 0.77 (0.41-1.43) | 0.40            | 0.88 (0.39-1.97)    | 0.76            |
| Alt-right                                  | 0  | 0  | 0  | 1  | 0.34            |                  |                 | 0.60 (0.09-3.96)    | 0.59            |
| Boogaloo movement                          | 0  | 0  | 0  | 1  | <b>0.03</b>     |                  |                 | 0.11 (0.01-1.15)    | 0.07            |
| Antifa                                     | 3  | 3  | 3  | 1  | 0.18            | 1.30 (0.58-2.89) | 0.53            | 3.93 (0.93-16.69)   | 0.06            |
| QAnon                                      | 0  | 0  | 1  | 1  | 0.06            | 0.15 (0.01-1.69) | 0.12            | 0.08 (0.01-0.93)    | <b>0.04</b>     |
| Anti-gun violence                          | 19 | 22 | 15 | 10 | <b>&lt;0.01</b> | 1.64 (1.16-2.30) | <b>&lt;0.01</b> | 2.68 (1.54-4.66)    | <b>&lt;0.01</b> |
| None of these                              | 52 | 49 | 54 | 62 | <b>0.01</b>     | 0.81 (0.63-1.05) | 0.12            | 0.57 (0.40-0.82)    | <b>&lt;0.01</b> |

Do you identify with or actively support any of  
the following organizations?

|                                                                         |    |    |    |    |                 |                  |                 |                   |                 |
|-------------------------------------------------------------------------|----|----|----|----|-----------------|------------------|-----------------|-------------------|-----------------|
| National Rifle Association (NRA)                                        | 11 | 9  | 13 | 18 | <b>&lt;0.01</b> | 0.61 (0.41-0.90) | <b>0.01</b>     | 0.43 (0.26-0.69)  | <b>&lt;0.01</b> |
| Heritage Foundation                                                     | 3  | 3  | 5  | 6  | 0.06            | 0.54 (0.28-1.02) | 0.06            | 0.44 (0.19-1.02)  | 0.06            |
| Planned Parenthood                                                      | 21 | 25 | 15 | 11 | <b>&lt;0.01</b> | 1.95 (1.37-2.78) | <b>&lt;0.01</b> | 2.75 (1.57-4.81)  | <b>&lt;0.01</b> |
| National Right to Life Committee                                        | 4  | 3  | 6  | 6  | <b>0.02</b>     | 0.49 (0.27-0.87) | <b>0.02</b>     | 0.51 (0.25-1.06)  | 0.07            |
| Greenpeace                                                              | 7  | 8  | 4  | 5  | <b>0.03</b>     | 2.12 (1.22-3.67) | <b>0.01</b>     | 1.74 (0.76-4.02)  | 0.19            |
| Sierra Club                                                             | 9  | 11 | 7  | 2  | <b>&lt;0.01</b> | 1.69 (1.02-2.82) | <b>0.04</b>     | 4.93 (1.82-13.38) | <b>&lt;0.01</b> |
| Amnesty International                                                   | 7  | 9  | 5  | 2  | <b>&lt;0.01</b> | 1.92 (1.09-3.38) | <b>0.02</b>     | 6.45 (2.03-20.52) | <b>&lt;0.01</b> |
| National Education Association Foundation                               | 6  | 7  | 5  | 4  | 0.22            | 1.40 (0.80-2.42) | 0.24            | 2.02 (0.73-5.57)  | 0.17            |
| American Civil Liberties Union (ACLU)                                   | 14 | 19 | 7  | 4  | <b>&lt;0.01</b> | 2.91 (1.86-4.56) | <b>&lt;0.01</b> | 5.06 (2.57-9.94)  | <b>&lt;0.01</b> |
| Americans for Prosperity                                                | 1  | 0  | 1  | 2  | <b>0.02</b>     | 0.25 (0.06-1.03) | 0.05            | 0.14 (0.03-0.66)  | <b>0.01</b>     |
| MoveOn.org                                                              | 8  | 10 | 4  | 2  | <b>&lt;0.01</b> | 2.62 (1.46-4.72) | <b>&lt;0.01</b> | 4.89 (1.97-12.11) | <b>&lt;0.01</b> |
| The NAACP/National Association for the<br>Advancement of Colored People | 13 | 15 | 11 | 9  | <b>0.02</b>     | 1.44 (1.00-2.07) | 0.05            | 1.80 (1.05-3.09)  | <b>0.03</b>     |
| American Red Cross                                                      | 24 | 26 | 22 | 17 | <b>0.03</b>     | 1.26 (0.93-1.71) | 0.14            | 1.73 (1.09-2.74)  | <b>0.02</b>     |
| Chamber of Commerce                                                     | 3  | 4  | 3  | 3  | 0.65            | 1.30 (0.65-2.60) | 0.45            | 1.41 (0.50-4.00)  | 0.52            |
| Freedom Caucus                                                          | 2  | 1  | 3  | 2  | 0.27            | 0.50 (0.22-1.16) | 0.11            | 0.83 (0.22-3.17)  | 0.79            |
| None of these                                                           | 52 | 49 | 54 | 60 | <b>0.03</b>     | 0.83 (0.64-1.07) | 0.15            | 0.64 (0.45-0.91)  | <b>0.01</b>     |

*Sources of Health Information*

Which of the following sources have you used to

look for health and wellness related information

or education in the past 12 months?

|                                                                                   |    |    |    |    |                 |                  |                 |                   |                 |
|-----------------------------------------------------------------------------------|----|----|----|----|-----------------|------------------|-----------------|-------------------|-----------------|
| Doctor                                                                            | 66 | 69 | 60 | 56 | <b>&lt;0.01</b> | 1.49 (1.14-1.95) | <b>&lt;0.01</b> | 1.77 (1.24-2.52)  | <b>&lt;0.01</b> |
| Pharmacist                                                                        | 24 | 25 | 21 | 21 | 0.22            | 1.29 (0.94-1.77) | 0.12            | 1.25 (0.82-1.92)  | 0.30            |
| Nurse, nurse practitioner or physician's assistant                                | 31 | 33 | 27 | 28 | 0.11            | 1.32 (0.99-1.77) | 0.06            | 1.26 (0.86-1.86)  | 0.23            |
| Relative, friend or co-worker                                                     | 23 | 23 | 24 | 25 | 0.79            | 0.93 (0.68-1.27) | 0.64            | 0.88 (0.59-1.33)  | 0.55            |
| Someone you know who has a particular medical condition                           | 8  | 7  | 9  | 10 | 0.35            | 0.75 (0.47-1.19) | 0.22            | 0.74 (0.40-1.34)  | 0.31            |
| Disease-related association or society                                            | 6  | 7  | 7  | 3  | 0.19            | 0.94 (0.57-1.55) | 0.81            | 2.08 (0.98-4.39)  | 0.06            |
| Patient support group or foundation                                               | 2  | 2  | 2  | 1  | 0.49            | 0.95 (0.42-2.15) | 0.91            | 2.47 (0.55-11.14) | 0.24            |
| Educational forum at a local clinic, hospital, community center or other location | 3  | 3  | 3  | 5  | 0.27            | 0.95 (0.48-1.91) | 0.89            | 0.55 (0.26-1.17)  | 0.12            |
| Pharmaceutical company                                                            | 1  | 1  | 1  | 2  | 0.89            | 1.22 (0.44-3.41) | 0.70            | 0.89 (0.27-2.98)  | 0.85            |
| Health insurance company                                                          | 8  | 8  | 9  | 5  | 0.31            | 0.92 (0.57-1.46) | 0.71            | 1.64 (0.87-3.08)  | 0.13            |
| Newspapers or magazines                                                           | 7  | 8  | 6  | 6  | 0.40            | 1.38 (0.83-2.32) | 0.22            | 1.28 (0.66-2.49)  | 0.47            |
| Television                                                                        | 6  | 7  | 6  | 6  | 0.69            | 1.2 (0.73-1.99)  | 0.47            | 1.22 (0.63-2.33)  | 0.56            |
| The internet                                                                      | 50 | 51 | 48 | 45 | 0.26            | 1.14 (0.88-1.47) | 0.33            | 1.3 (0.92-1.84)   | 0.14            |
| Social Media (such as Facebook, Twitter)                                          | 5  | 4  | 7  | 7  | 0.07            | 0.57 (0.33-0.97) | <b>0.04</b>     | 0.59 (0.30-1.16)  | 0.13            |
| Healthcare app for smartphone or tablet                                           | 6  | 6  | 5  | 9  | 0.23            | 1.26 (0.69-2.29) | 0.45            | 0.65 (0.35-1.22)  | 0.18            |

Have not looked for information in the past 12

|        |    |    |    |    |                 |                  |             |                  |                 |
|--------|----|----|----|----|-----------------|------------------|-------------|------------------|-----------------|
| months | 17 | 14 | 20 | 24 | <b>&lt;0.01</b> | 0.65 (0.46-0.91) | <b>0.01</b> | 0.52 (0.34-0.81) | <b>&lt;0.01</b> |
|--------|----|----|----|----|-----------------|------------------|-------------|------------------|-----------------|

*Barriers, Specific Concerns and Other Reasons For Not*

*Getting the Flu Vaccine*

Of those who did not get a flu shot this past

year: this is because...<sup>i</sup>

|                                                         |    |    |    |    |                 |                   |             |                     |                 |
|---------------------------------------------------------|----|----|----|----|-----------------|-------------------|-------------|---------------------|-----------------|
| The flu is not a serious illness                        | 8  | 6  | 8  | 11 | 0.37            | 0.71 (0.28-1.80)  | 0.47        | 0.50 (0.20-1.28)    | 0.15            |
| I'm healthy                                             | 20 | 17 | 24 | 22 | 0.29            | 0.65 (0.37-1.15)  | 0.14        | 0.71 (0.37-1.35)    | 0.29            |
| I just didn't think about it                            | 25 | 29 | 28 | 11 | <b>&lt;0.01</b> | 1.07 (0.65-1.74)  | 0.79        | 3.43 (1.59-7.42)    | <b>&lt;0.01</b> |
| I didn't know where to get it                           | 1  | 2  | 0  | 0  | 0.07            | 6.57 (1.01-42.58) | <b>0.05</b> |                     |                 |
| I didn't have health insurance                          | 4  | 5  | 4  | 0  | <b>0.02</b>     | 1.47 (0.60-3.60)  | 0.40        | 17.58 (2.20-140.51) | <b>0.01</b>     |
| I didn't have time                                      | 8  | 10 | 10 | 1  | <b>0.02</b>     | 1.06 (0.50-2.27)  | 0.88        | 8.28 (1.85-37.03)   | <b>0.01</b>     |
| I don't believe in vaccines                             | 2  | 0  | 1  | 5  | <b>&lt;0.01</b> | 0.27 (0.05-1.43)  | 0.12        | 0.06 (0.01-0.28)    | <b>&lt;0.01</b> |
| I'm afraid of the side effects                          | 8  | 5  | 10 | 12 | 0.08            | 0.44 (0.17-1.13)  | 0.09        | 0.36 (0.14-0.96)    | <b>0.04</b>     |
| I'm afraid of needles                                   | 5  | 5  | 4  | 6  | 0.90            | 1.10 (0.38-3.20)  | 0.87        | 0.83 (0.29-2.42)    | 0.74            |
| I prefer alternative (homeopathic) medicine to vaccines | 7  | 3  | 10 | 13 | <b>0.01</b>     | 0.28 (0.09-0.83)  | <b>0.02</b> | 0.21 (0.07-0.65)    | <b>0.01</b>     |
| I have never had the flu                                | 13 | 11 | 17 | 6  | <b>0.03</b>     | 0.60 (0.32-1.11)  | 0.10        | 1.91 (0.72-5.05)    | 0.19            |
| The vaccine will make me sick with the flu              | 7  | 8  | 6  | 8  | 0.70            | 1.36 (0.61-3.05)  | 0.45        | 0.95 (0.40-2.28)    | 0.91            |

I got a flu shot the year before so I didn't need

|                |    |    |    |    |             |                  |      |                   |             |
|----------------|----|----|----|----|-------------|------------------|------|-------------------|-------------|
| it             | 1  | 1  | 2  | 0  | 0.26        | 0.47 (0.15-1.51) | 0.21 | 1.77 (0.21-14.84) | 0.60        |
| Another reason | 26 | 25 | 21 | 39 | <b>0.01</b> | 1.29 (0.77-2.14) | 0.33 | 0.53 (0.31-0.91)  | <b>0.02</b> |

Red text indicates survey items reflecting negative vaccine attitudes

<sup>a</sup> Column percentages (of vaccinated), weighted according to survey weights to achieve national representativeness

<sup>b</sup> Column percentages (of corresponding hesitancy categories) (except for first row "All" which is a row percentage), weighted according to survey weights to achieve national representativeness

<sup>c</sup> using the Pearson chi-square test at significance level of alpha=5%; bold indicates statistical significance (p<0.05)

<sup>d</sup> Construct scales combine scores for each relevant survey item (reversing negative items) and divide by maximum (e.g., 100 being complete trust and 0 being complete distrust); after dichotomizing at median, binary variable represents high vs low score (e.g., 1 being high trust and 0 being low trust)

<sup>e</sup> Likert scale response options (strongly agree, agree, disagree, strongly disagree, don't know) dichotomized to agree/disagree (don't know coded as disagree), results for agreement shown; other scale response options dichotomized to reflect affirmative/negative, results for affirmative shown

<sup>i</sup> asked only to vaccinated respondents

<sup>j</sup> Odds Ratio (95% Confidence Interval) of hesitating vs not hesitating before receiving COVID-19 vaccine for affirmative survey response vs not

<sup>k</sup> Reference category for logistic regression of categorical variables
