# Supplementary material for: COVID-19 Vaccination Status, Attitudes, and Values among US Adults in September 2021
Source: MDPI journal article supplement (doi:10.3390/jcm11133734), 2022-06-28
Supplement: s1 [file s1]

**Table S12. Frequency and Odds of Intention to Get COVID-19 Vaccine (3 groups) among Unvaccinated by Political Activities and Support, Sources of Health Information, and Reasons For Not Getting the Flu Vaccine**

Numbers in the "Total" column indicate the percentage of the unvaccinated weighted sample providing the September 2021 survey response in each row. Numbers in the "Vaccine Intentions" columns indicate the percentage of those whose COVID-19 vaccine intentions match that of the column header who provided the survey response in each row. The numbers in the "OR (95%CI)" columns indicate the Odds Ratio comparing the different vaccine intentions matching that of the column header by the survey response in each row. The numbers in the "P-value" columns indicate the p-value of the associations described in the columns to the left, boldface indicating statistical significance ( $p < 0.05$ ).

|                                    | Total             | Vaccine Intentions, % <sup>b</sup> |           |          | Likely vs. Unlikely |                         | Uncertain vs. Unlikely |                         |                    |
|------------------------------------|-------------------|------------------------------------|-----------|----------|---------------------|-------------------------|------------------------|-------------------------|--------------------|
|                                    | Unvacc-<br>inated |                                    |           |          | p-                  |                         | p-                     |                         |                    |
| Survey Items                       | (%) <sup>a</sup>  | Likely                             | Uncertain | Unlikely | value <sup>c</sup>  | OR (95%CI) <sup>j</sup> | value <sup>c</sup>     | OR (95%CI) <sup>j</sup> | value <sup>c</sup> |
| All                                | 100               | 6                                  | 55        | 40       |                     |                         |                        |                         |                    |
| Affirmative Responses to           |                   |                                    |           |          |                     |                         |                        |                         |                    |
| Survey Items <sup>e</sup>          |                   |                                    |           |          |                     |                         |                        |                         |                    |
| Political Activities and Support   |                   |                                    |           |          |                     |                         |                        |                         |                    |
| People may be involved in          |                   |                                    |           |          |                     |                         |                        |                         |                    |
| civic and political activities. In |                   |                                    |           |          |                     |                         |                        |                         |                    |
| the past 12 months, have           |                   |                                    |           |          |                     |                         |                        |                         |                    |
| you...                             |                   |                                    |           |          |                     |                         |                        |                         |                    |
| Attended a political protest       | 4                 | 4                                  | 2         | 8        | 0.01                | 0.45 (0.05-3.80)        | 0.46                   | 0.23 (0.08-0.62)        | <0.01              |

|                                                                                     |    |    |    |    |             |                   |      |                  |             |
|-------------------------------------------------------------------------------------|----|----|----|----|-------------|-------------------|------|------------------|-------------|
| or rally                                                                            |    |    |    |    |             |                   |      |                  |             |
| Contacted a government official                                                     | 13 | 23 | 8  | 17 | <b>0.03</b> | 1.52 (0.44-5.34)  | 0.51 | 0.44 (0.22-0.88) | <b>0.02</b> |
| Volunteered or worked for a Presidential campaign                                   | 2  | 0  | 2  | 2  | 0.83        |                   |      | 0.99 (0.18-5.27) | 0.99        |
| Volunteered or worked for a political candidate other than a Presidential campaign  | 1  | 0  | 0  | 3  | 0.24        |                   |      | 0.19 (0.02-1.72) | 0.14        |
| Volunteered or worked for a political party, issue, or cause                        | 2  | 7  | 1  | 2  | 0.20        | 3.07 (0.33-28.86) | 0.32 | 0.51 (0.12-2.13) | 0.36        |
| Served on a committee for a civic, non-profit or community organization             | 3  | 1  | 3  | 4  | 0.55        | 0.21 (0.02-1.90)  | 0.16 | 0.78 (0.24-2.61) | 0.69        |
| Written a letter or email to a newspaper/magazine or called a live radio or TV show | 5  | 0  | 4  | 6  | 0.54        |                   |      | 0.77 (0.26-2.24) | 0.62        |
| Commented about politics on a message board or internet site                        | 18 | 28 | 14 | 22 | 0.11        | 1.41 (0.46-4.32)  | 0.54 | 0.59 (0.34-1.04) | 0.07        |

|                                                                                    |    |    |    |    |                 |                   |                 |                  |      |
|------------------------------------------------------------------------------------|----|----|----|----|-----------------|-------------------|-----------------|------------------|------|
| Shared your opinion about a town or community issue at a public meeting            | 4  | 7  | 2  | 4  | 0.45            | 1.78 (0.20-15.67) | 0.60            | 0.51 (0.12-2.09) | 0.35 |
| Held a publicly elected office                                                     | 0  | 0  | 0  | 0  | 0.68            |                   |                 |                  |      |
| Signed a petition                                                                  | 23 | 35 | 20 | 25 | 0.25            | 1.56 (0.57-4.30)  | 0.38            | 0.75 (0.45-1.25) | 0.27 |
| Ran for a publicly elected office                                                  | 0  | 0  | 0  | 0  |                 |                   |                 |                  |      |
| None of these                                                                      | 64 | 63 | 66 | 63 | 0.83            | 1 (0.38-2.60)     | 0.99            | 1.15 (0.73-1.80) | 0.55 |
| Do you identify with or actively support any of the following political movements? |    |    |    |    |                 |                   |                 |                  |      |
| Tea Party (Taxed Enough Already)                                                   | 9  | 8  | 7  | 13 | 0.18            | 0.6 (0.09-3.87)   | 0.59            | 0.47 (0.22-1.02) | 0.06 |
| Environmental Rights                                                               | 11 | 19 | 12 | 8  | 0.30            | 2.66 (0.67-10.5)  | 0.16            | 1.55 (0.69-3.45) | 0.28 |
| Women's Rights/ Me Too                                                             | 15 | 23 | 16 | 11 | 0.24            | 2.35 (0.75-7.32)  | 0.14            | 1.53 (0.79-3.00) | 0.21 |
| Racial Equality                                                                    | 17 | 44 | 17 | 12 | <b>&lt;0.01</b> | 5.52 (2.04-14.89) | <b>&lt;0.01</b> | 1.48 (0.79-2.78) | 0.22 |
| Right to Life                                                                      | 23 | 16 | 22 | 26 | 0.52            | 0.56 (0.17-1.88)  | 0.35            | 0.80 (0.47-1.35) | 0.40 |
| Peace/Anti-War                                                                     | 8  | 15 | 6  | 9  | 0.26            | 1.73 (0.53-5.71)  | 0.36            | 0.67 (0.30-1.51) | 0.33 |
| Lesbian, Gay, Bisexual,                                                            | 10 | 29 | 9  | 8  | <b>0.02</b>     | 4.83 (1.44-16.28) | <b>0.01</b>     | 1.15 (0.48-2.78) | 0.75 |

Transgender, Queer

(LGBTQ) Rights

|                    |    |    |    |    |                 |                   |      |                   |                 |
|--------------------|----|----|----|----|-----------------|-------------------|------|-------------------|-----------------|
| Indivisible        | 2  | 9  | 1  | 2  | 0.10            | 4.62 (0.54-39.61) | 0.16 | 0.61 (0.11-3.28)  | 0.56            |
| Black Lives Matter | 16 | 25 | 16 | 13 | 0.35            | 2.19 (0.74-6.52)  | 0.16 | 1.27 (0.68-2.36)  | 0.45            |
| Men's Rights       | 5  | 4  | 4  | 6  | 0.45            | 0.56 (0.06-4.85)  | 0.60 | 0.56 (0.21-1.50)  | 0.25            |
| Alt-right          | 1  | 0  | 2  | 1  | 0.83            |                   |      | 1.38 (0.17-11.08) | 0.76            |
| Boogaloo movement  | 0  | 0  | 0  | 1  | 0.35            |                   |      | 0.11 (0.01-1.80)  | 0.12            |
| Antifa             | 0  | 0  | 0  | 0  | 0.66            |                   |      |                   |                 |
| QAnon              | 3  | 0  | 0  | 7  | <b>&lt;0.01</b> |                   |      | 0.02 (0.00-0.12)  | <b>&lt;0.01</b> |
| Anti-gun violence  | 7  | 10 | 8  | 5  | 0.51            | 1.86 (0.51-6.84)  | 0.35 | 1.48 (0.62-3.55)  | 0.38            |
| None of these      | 55 | 40 | 57 | 56 | 0.30            | 0.52 (0.21-1.26)  | 0.15 | 1.04 (0.67-1.62)  | 0.85            |

Do you identify with or  
actively support any of the  
following organizations?

National Rifle Association

|                        |    |    |    |    |                 |                    |                 |                  |                 |
|------------------------|----|----|----|----|-----------------|--------------------|-----------------|------------------|-----------------|
| (NRA)                  | 21 | 6  | 16 | 31 | <b>&lt;0.01</b> | 0.15 (0.04-0.56)   | <b>&lt;0.01</b> | 0.43 (0.25-0.74) | <b>&lt;0.01</b> |
| Heritage Foundation    | 3  | 1  | 3  | 3  | 0.68            | 0.31 (0.03-2.83)   | 0.30            | 0.83 (0.25-2.83) | 0.77            |
| Planned Parenthood     | 11 | 37 | 12 | 6  | <b>&lt;0.01</b> | 10.05 (3.20-31.54) | <b>&lt;0.01</b> | 2.28 (1.00-5.22) | 0.05            |
| National Right to Life |    |    |    |    |                 |                    |                 |                  |                 |
| Committee              | 8  | 1  | 7  | 9  | 0.21            | 0.13 (0.02-1.1)    | 0.06            | 0.69 (0.31-1.53) | 0.36            |

|                          |    |    |    |    |                 |                     |                 |                   |      |
|--------------------------|----|----|----|----|-----------------|---------------------|-----------------|-------------------|------|
| Greenpeace               | 4  | 12 | 5  | 2  | 0.11            | 6.86 (0.91-51.97)   | 0.06            | 2.52 (0.60-10.60) | 0.21 |
| Sierra Club              | 3  | 8  | 3  | 3  | 0.38            | 3.45 (0.40-30.04)   | 0.26            | 1.01 (0.26-3.89)  | 0.99 |
| Amnesty International    | 2  | 12 | 2  | 0  | <b>&lt;0.01</b> |                     |                 |                   |      |
| National Education       |    |    |    |    |                 |                     |                 |                   |      |
| Association Foundation   | 6  | 16 | 7  | 4  | 0.16            | 4.64 (0.87-24.91)   | 0.07            | 1.98 (0.59-6.57)  | 0.27 |
| American Civil Liberties |    |    |    |    |                 |                     |                 |                   |      |
| Union (ACLU)             | 3  | 13 | 4  | 1  | <b>0.01</b>     | 18.43 (2.09-162.43) | <b>0.01</b>     | 5.62 (0.98-32.23) | 0.05 |
| Americans for Prosperity | 3  | 15 | 2  | 2  | <b>0.01</b>     | 10.23 (1.33-78.63)  | <b>0.03</b>     | 1.44 (0.27-7.61)  | 0.67 |
| MoveOn.org               | 2  | 17 | 1  | 1  | <b>&lt;0.01</b> | 16.13 (2.81-92.69)  | <b>&lt;0.01</b> | 1.11 (0.25-4.99)  | 0.89 |
| The NAACP/National       |    |    |    |    |                 |                     |                 |                   |      |
| Association for the      |    |    |    |    |                 |                     |                 |                   |      |
| Advancement of Colored   |    |    |    |    |                 |                     |                 |                   |      |
| People                   | 8  | 19 | 9  | 5  | 0.06            | 4.13 (1.16-14.71)   | <b>0.03</b>     | 1.80 (0.80-4.06)  | 0.16 |
| American Red Cross       | 18 | 38 | 19 | 13 | <b>0.02</b>     | 4.09 (1.48-11.3)    | <b>0.01</b>     | 1.59 (0.88-2.88)  | 0.12 |
| Chamber of Commerce      | 3  | 6  | 4  | 1  | 0.11            | 10.61 (0.63-179.69) | 0.10            | 7.02 (0.86-56.93) | 0.07 |
| Freedom Caucus           | 2  | 9  | 2  | 3  | 0.12            | 3.56 (0.53-23.84)   | 0.19            | 0.60 (0.15-2.45)  | 0.48 |
| None of these            | 57 | 46 | 60 | 54 | 0.27            | 0.74 (0.30-1.78)    | 0.50            | 1.31 (0.84-2.03)  | 0.23 |

*Sources of Health Information*

Which of the following

sources have you used to look  
for health and wellness related  
information or education in  
the past 12 months?

|                                                                                         |    |    |    |    |      |                   |             |                   |             |
|-----------------------------------------------------------------------------------------|----|----|----|----|------|-------------------|-------------|-------------------|-------------|
| Doctor                                                                                  | 42 | 42 | 44 | 38 | 0.47 | 1.17 (0.47-2.89)  | 0.74        | 1.31 (0.84-2.04)  | 0.23        |
| Pharmacist                                                                              | 14 | 17 | 17 | 10 | 0.13 | 1.82 (0.51-6.43)  | 0.35        | 1.92 (1.02-3.60)  | <b>0.04</b> |
| Nurse, nurse practitioner or<br>physician's assistant                                   | 21 | 34 | 22 | 18 | 0.20 | 2.41 (0.88-6.63)  | 0.09        | 1.32 (0.76-2.28)  | 0.32        |
| Relative, friend or co-worker                                                           | 24 | 41 | 25 | 20 | 0.10 | 2.82 (1.06-7.46)  | <b>0.04</b> | 1.37 (0.80-2.34)  | 0.26        |
| Someone you know who has<br>a particular medical<br>condition                           | 10 | 10 | 13 | 7  | 0.28 | 1.46 (0.23-9.31)  | 0.69        | 1.99 (0.88-4.50)  | 0.10        |
| Disease-related association<br>or society                                               | 3  | 0  | 2  | 4  | 0.46 |                   |             | 0.55 (0.15-2.00)  | 0.36        |
| Patient support group or<br>foundation                                                  | 2  | 0  | 2  | 2  | 0.79 |                   |             | 1.15 (0.24-5.48)  | 0.86        |
| Educational forum at a local<br>clinic, hospital, community<br>center or other location | 4  | 7  | 4  | 2  | 0.57 | 3.12 (0.30-32.27) | 0.34        | 1.66 (0.42-6.59)  | 0.47        |
| Pharmaceutical company                                                                  | 1  | 1  | 2  | 1  | 0.56 | 1.41 (0.08-23.81) | 0.81        | 2.32 (0.24-22.15) | 0.46        |

|                                                             |    |    |    |    |      |                      |             |                   |      |
|-------------------------------------------------------------|----|----|----|----|------|----------------------|-------------|-------------------|------|
| Health insurance company                                    | 4  | 2  | 5  | 2  | 0.09 | 0.91 (0.10-10-8.26)  | 0.93        | 2.72 (0.92-8.07)  | 0.07 |
| Newspapers or magazines                                     | 4  | 2  | 5  | 2  | 0.20 | 1.06 (0.10-10-11.59) | 0.96        | 2.76 (0.65-11.78) | 0.17 |
| Television                                                  | 7  | 9  | 8  | 4  | 0.34 | 2.32 (0.52-10.4)     | 0.27        | 1.92 (0.64-5.78)  | 0.25 |
| The internet                                                | 43 | 54 | 44 | 40 | 0.48 | 1.71 (0.71-4.15)     | 0.23        | 1.14 (0.74-1.78)  | 0.55 |
| Social Media (such as<br>Facebook, Twitter)                 | 7  | 15 | 6  | 7  | 0.37 | 2.39 (0.56-10.28)    | 0.24        | 0.90 (0.35-2.32)  | 0.82 |
| Healthcare app for<br>smartphone or tablet                  | 6  | 9  | 4  | 8  | 0.11 | 1.18 (0.29-4.76)     | 0.81        | 0.44 (0.18-1.06)  | 0.07 |
| Have not looked for<br>information in the past 12<br>months | 33 | 14 | 32 | 38 | 0.05 | 0.27 (0.09-0.78)     | <b>0.02</b> | 0.75 (0.48-1.19)  | 0.22 |

*Barriers, Specific Concerns and  
Other Reasons For Not Getting the  
Flu Vaccine*

Of those who did not get a flu  
shot this past year: this is  
because...<sup>i</sup>

The flu is not a serious  
illness

|    |   |    |    |      |  |  |  |                  |      |
|----|---|----|----|------|--|--|--|------------------|------|
| 12 | 0 | 10 | 17 | 0.08 |  |  |  | 0.54 (0.26-1.12) | 0.10 |
|----|---|----|----|------|--|--|--|------------------|------|

|                                                         |    |    |    |    |                 |                   |                 |                   |                 |
|---------------------------------------------------------|----|----|----|----|-----------------|-------------------|-----------------|-------------------|-----------------|
| I'm healthy                                             | 26 | 21 | 25 | 27 | 0.88            | 0.72 (0.17-3.04)  | 0.66            | 0.92 (0.54-1.57)  | 0.76            |
| I just didn't think about it                            | 19 | 51 | 21 | 13 | <b>&lt;0.01</b> | 6.82 (2.12-21.94) | <b>&lt;0.01</b> | 1.68 (0.86-3.29)  | 0.13            |
| I didn't know where to get it                           | 1  | 0  | 1  | 1  | 0.87            |                   |                 | 1.57 (0.14-18.17) | 0.72            |
| I didn't have health insurance                          | 3  | 0  | 4  | 1  | 0.13            |                   |                 | 5.41 (0.67-43.60) | 0.11            |
| I didn't have time                                      | 2  | 4  | 3  | 0  | 0.06            |                   |                 |                   |                 |
| I don't believe in vaccines                             | 12 | 0  | 6  | 22 | <b>&lt;0.01</b> |                   |                 | 0.22 (0.11-0.48)  | <b>&lt;0.01</b> |
| I'm afraid of the side effects                          | 15 | 6  | 13 | 18 | 0.20            | 0.28 (0.07-1.1)   | 0.07            | 0.71 (0.38-1.33)  | 0.28            |
| I'm afraid of needles                                   | 4  | 3  | 4  | 4  | 0.89            | 0.84 (0.09-7.95)  | 0.88            | 1.21 (0.36-4.07)  | 0.76            |
| I prefer alternative (homeopathic) medicine to vaccines | 15 | 28 | 10 | 19 | 0.06            | 1.64 (0.40-6.69)  | 0.49            | 0.49 (0.26-0.95)  | <b>0.03</b>     |
| I have never had the flu                                | 13 | 0  | 13 | 16 | 0.22            |                   |                 | 0.76 (0.39-1.47)  | 0.41            |
| The vaccine will make me sick with the flu              | 12 | 3  | 13 | 13 | 0.40            | 0.23 (0.04-1.17)  | 0.08            | 1.01 (0.50-2.04)  | 0.98            |
| I got a flu shot the year before so I didn't need it    | 4  | 1  | 3  | 6  | 0.28            | 0.18 (0.02-1.7)   | 0.13            | 0.53 (0.15-1.81)  | 0.31            |
| Another reason                                          | 27 | 26 | 24 | 31 | 0.38            | 0.79 (0.25-2.54)  | 0.69            | 0.70 (0.41-1.20)  | 0.19            |

Red text indicates survey items reflecting negative vaccine attitudes

<sup>a</sup> Column percentages (of unvaccinated), weighted according to survey weights to achieve national representativeness



<sup>b</sup> Column percentages (of corresponding intention categories) (except for first row "All" which is a row percentage), weighted according to survey weights to achieve national representativeness

<sup>c</sup> using the Pearson chi-square test at significance level of  $\alpha=5\%$ ; bold indicates statistical significance ( $p<0.05$ )

<sup>e</sup> Likert scale response options (strongly agree, agree, disagree, strongly disagree, don't know) dichotomized to agree/disagree (don't know coded as disagree), results for agreement shown; other scale response options dichotomized to reflect affirmative/negative, results for affirmative shown

<sup>i</sup> asked only to respondents reporting not receiving the flu shot

<sup>j</sup> Odds Ratio (95% Confidence Interval) of uncertainty vs unlikeliness to receive COVID-19 vaccine for affirmative survey response vs not

<sup>k</sup> Reference category for logistic regression of categorical variables
