# Supplementary material for: COVID-19 Vaccination Status, Attitudes, and Values among US Adults in September 2021
Source: MDPI journal article supplement (doi:10.3390/jcm11133734), 2022-06-28
Supplement: s1 [file s1]

**Table S11. Frequency and Odds of COVID-19 Vaccination by Political Activities and Support, Sources of Health Information, and Reasons For Not Getting the Flu Vaccine**

*Numbers in the "Total" column indicate the percentage of the total weighted sample providing the September 2021 survey response in each row. Numbers in the "COVID-19 Vaccination" columns indicate the percentage of those whose COVID-19 vaccination status match that of the column header who provided the survey response in each row. The numbers in the "OR (95%CI)" column indicate the Odds Ratio of being vaccinated vs unvaccinated by the survey response in each row. The numbers in the final column indicate the p-value of this association, boldface indicating statistical significance ( $p < 0.05$ ).*

| Survey Items                                                                                 | Total            | COVID-19 Vaccination, % <sup>b</sup> |            | OR (95%CI) <sup>i</sup> | p-value <sup>c</sup> |
|----------------------------------------------------------------------------------------------|------------------|--------------------------------------|------------|-------------------------|----------------------|
|                                                                                              | (%) <sup>a</sup> | Unvaccinated                         | Vaccinated |                         |                      |
| All                                                                                          | 100              | 23                                   | 77         |                         |                      |
| <b>Affirmative Responses to Survey Items<sup>c</sup></b>                                     |                  |                                      |            |                         |                      |
| <i>Political Activities and Support</i>                                                      |                  |                                      |            |                         |                      |
| People may be involved in civic and political activities. In the past 12 months, have you... |                  |                                      |            |                         |                      |
| Attended a political protest or rally                                                        | 7                | 4                                    | 7          | 1.73 (0.99-3.01)        | 0.05                 |
| Contacted a government official                                                              | 15               | 13                                   | 16         | 1.35 (0.95-1.92)        | 0.09                 |
| Volunteered or worked for a Presidential campaign                                            | 3                | 2                                    | 3          | 1.97 (0.79-4.89)        | 0.14                 |
| Volunteered or worked for a political candidate other than a Presidential campaign           | 2                | 1                                    | 3          | 2.18 (0.74-6.44)        | 0.15                 |
| Volunteered or worked for a political party, issue, or cause                                 | 4                | 2                                    | 4          | 2.16 (1.03-4.54)        | <b>0.04</b>          |
| Served on a committee for a civic, non-profit or community organization                      | 5                | 3                                    | 6          | 1.75 (0.95-3.22)        | 0.07                 |
| Written a letter or email to a                                                               | 4                | 5                                    | 4          | 0.80 (0.45-1.44)        | 0.46                 |

|                                           |    |    |    |                     |                 |
|-------------------------------------------|----|----|----|---------------------|-----------------|
| newspaper/magazine or called a live       |    |    |    |                     |                 |
| radio or TV show                          |    |    |    |                     |                 |
| Commented about politics on a message     |    |    |    |                     |                 |
| board or internet site                    | 19 | 18 | 20 | 1.12 (0.83-1.51)    | 0.48            |
| Shared your opinion about a town or       |    |    |    |                     |                 |
| community issue at a public meeting       | 4  | 4  | 4  | 1.28 (0.66-2.46)    | 0.46            |
| Held a publicly elected office            | 0  | 0  | 0  | 1.56 (0.18-13.21)   | 0.68            |
| Signed a petition                         | 26 | 23 | 27 | 1.20 (0.92-1.58)    | 0.18            |
| Ran for a publicly elected office         | 0  | 0  | 0  |                     | 0.27            |
| None of these                             | 60 | 64 | 59 | 0.81 (0.64-1.03)    | 0.09            |
| Do you identify with or actively support  |    |    |    |                     |                 |
| any of the following political movements? |    |    |    |                     |                 |
| Tea Party (Taxed Enough Already)          | 6  | 9  | 5  | 0.51 (0.33-0.79)    | <b>&lt;0.01</b> |
| Environmental Rights                      | 20 | 11 | 23 | 2.39 (1.66-3.44)    | <b>&lt;0.01</b> |
| Women's Rights/ Me Too                    | 23 | 15 | 26 | 2.03 (1.48-2.79)    | <b>&lt;0.01</b> |
| Racial Equality                           | 26 | 17 | 29 | 1.99 (1.49-2.66)    | <b>&lt;0.01</b> |
| Right to Life                             | 15 | 23 | 12 | 0.46 (0.34-0.62)    | <b>&lt;0.01</b> |
| Peace/Anti-War                            | 11 | 8  | 12 | 1.63 (1.08-2.44)    | <b>0.02</b>     |
| Lesbian, Gay, Bisexual, Transgender,      |    |    |    |                     |                 |
| Queer (LGBTQ) Rights                      | 19 | 10 | 22 | 2.60 (1.76-3.84)    | <b>&lt;0.01</b> |
| Indivisible                               | 2  | 2  | 2  | 0.94 (0.39-2.24)    | 0.89            |
| Black Lives Matter                        | 25 | 16 | 28 | 2.04 (1.51-2.75)    | <b>&lt;0.01</b> |
| Men's Rights                              | 4  | 5  | 4  | 0.76 (0.44-1.31)    | 0.32            |
| Alt-right                                 | 1  | 1  | 0  | 0.26 (0.07-0.92)    | <b>0.02</b>     |
| Boogaloo movement                         | 0  | 0  | 0  | 0.43 (0.05-3.47)    | 0.41            |
| Antifa                                    | 2  | 0  | 3  | 48.17 (6.58-352.52) | <b>&lt;0.01</b> |
| QAnon                                     | 1  | 3  | 0  | 0.14 (0.05-0.43)    | <b>&lt;0.01</b> |
| Anti-gun violence                         | 16 | 7  | 19 | 3.12 (2.11-4.61)    | <b>&lt;0.01</b> |

|                                                                                 |    |    |    |                   |                 |
|---------------------------------------------------------------------------------|----|----|----|-------------------|-----------------|
| None of these                                                                   | 53 | 55 | 52 | 0.86 (0.68-1.08)  | 0.19            |
| Do you identify with or actively support<br>any of the following organizations? |    |    |    |                   |                 |
| National Rifle Association (NRA)                                                | 13 | 21 | 11 | 0.44 (0.33-0.61)  | <b>&lt;0.01</b> |
| Heritage Foundation                                                             | 3  | 3  | 3  | 1.17 (0.60-2.28)  | 0.64            |
| Planned Parenthood                                                              | 19 | 11 | 21 | 2.18 (1.53-3.10)  | <b>&lt;0.01</b> |
| National Right to Life Committee                                                | 5  | 8  | 4  | 0.56 (0.35-0.90)  | <b>0.01</b>     |
| Greenpeace                                                                      | 6  | 4  | 7  | 1.72 (0.99-2.97)  | 0.05            |
| Sierra Club                                                                     | 8  | 3  | 9  | 3.28 (1.69-6.37)  | <b>&lt;0.01</b> |
| Amnesty International                                                           | 6  | 2  | 7  | 4.41 (1.94-10.04) | <b>&lt;0.01</b> |
| National Education Association<br>Foundation                                    | 6  | 6  | 6  | 1.00 (0.59-1.68)  | 0.99            |
| American Civil Liberties Union (ACLU)                                           | 12 | 3  | 14 | 4.88 (2.75-8.68)  | <b>&lt;0.01</b> |
| Americans for Prosperity                                                        | 1  | 3  | 1  | 0.25 (0.10-0.61)  | <b>&lt;0.01</b> |
| MoveOn.org                                                                      | 7  | 2  | 8  | 3.70 (1.86-7.38)  | <b>&lt;0.01</b> |
| The NAACP/National Association for<br>the Advancement of Colored People         | 12 | 8  | 13 | 1.67 (1.15-2.42)  | <b>0.01</b>     |
| American Red Cross                                                              | 23 | 18 | 24 | 1.44 (1.07-1.93)  | <b>0.02</b>     |
| Chamber of Commerce                                                             | 3  | 3  | 3  | 1.27 (0.64-2.51)  | 0.49            |
| Freedom Caucus                                                                  | 2  | 2  | 2  | 0.71 (0.33-1.51)  | 0.37            |
| None of these                                                                   | 53 | 57 | 52 | 0.82 (0.65-1.04)  | 0.10            |

#### *Sources of Health Information*

Which of the following sources have you  
used to look for health and wellness related  
information or education in the past 12  
months?

|        |    |    |    |                  |                 |
|--------|----|----|----|------------------|-----------------|
| Doctor | 60 | 42 | 66 | 2.66 (2.10-3.37) | <b>&lt;0.01</b> |
|--------|----|----|----|------------------|-----------------|

|                                                                                   |    |    |    |                  |                 |
|-----------------------------------------------------------------------------------|----|----|----|------------------|-----------------|
| Pharmacist                                                                        | 21 | 14 | 24 | 1.87 (1.37-2.57) | <b>&lt;0.01</b> |
| Nurse, nurse practitioner or physician's assistant                                | 29 | 21 | 31 | 1.66 (1.26-2.20) | <b>&lt;0.01</b> |
| Relative, friend or co-worker                                                     | 23 | 24 | 23 | 0.94 (0.71-1.24) | 0.65            |
| Someone you know who has a particular medical condition                           | 8  | 10 | 8  | 0.78 (0.52-1.17) | 0.23            |
| Disease-related association or society                                            | 5  | 3  | 6  | 2.04 (1.06-3.93) | <b>0.03</b>     |
| Patient support group or foundation                                               | 2  | 2  | 2  | 1.16 (0.50-2.70) | 0.74            |
| Educational forum at a local clinic, hospital, community center or other location | 3  | 4  | 3  | 0.83 (0.44-1.57) | 0.57            |
| Pharmaceutical company                                                            | 1  | 1  | 1  | 1.05 (0.38-2.89) | 0.92            |
| Health insurance company                                                          | 7  | 4  | 8  | 2.16 (1.25-3.72) | <b>&lt;0.01</b> |
| Newspapers or magazines                                                           | 7  | 4  | 7  | 2.07 (1.14-3.77) | <b>0.02</b>     |
| Television                                                                        | 6  | 7  | 6  | 0.96 (0.61-1.54) | 0.88            |
| The internet                                                                      | 48 | 43 | 50 | 1.30 (1.03-1.65) | <b>0.03</b>     |
| Social Media (such as Facebook, Twitter)                                          | 6  | 7  | 5  | 0.76 (0.47-1.24) | 0.27            |
| Healthcare app for smartphone or tablet                                           | 6  | 6  | 6  | 1.04 (0.65-1.67) | 0.86            |
| Have not looked for information in the past 12 months                             | 21 | 33 | 17 | 0.40 (0.31-0.52) | <b>&lt;0.01</b> |

*Barriers, Specific Concerns and Other Reasons*

*For Not Getting the Flu Vaccine*

Of those who did not get a flu shot this past year: this is because...<sup>i</sup>

|                                  |    |    |    |                  |      |
|----------------------------------|----|----|----|------------------|------|
| The flu is not a serious illness | 9  | 12 | 8  | 0.60 (0.35-1.02) | 0.06 |
| I'm healthy                      | 22 | 26 | 20 | 0.72 (0.50-1.03) | 0.07 |
| I just didn't think about it     | 22 | 19 | 25 | 1.43 (0.98-2.09) | 0.07 |

|                                                            |    |    |    |                   |                 |
|------------------------------------------------------------|----|----|----|-------------------|-----------------|
| I didn't know where to get it                              | 1  | 1  | 1  | 1.15 (0.27-4.93)  | 0.85            |
| I didn't have health insurance                             | 3  | 3  | 4  | 1.47 (0.67-3.21)  | 0.33            |
| I didn't have time                                         | 5  | 2  | 8  | 5.20 (2.17-12.46) | <b>&lt;0.01</b> |
| I don't believe in vaccines                                | 6  | 12 | 2  | 0.11 (0.05-0.22)  | <b>&lt;0.01</b> |
| I'm afraid of the side effects                             | 11 | 15 | 8  | 0.50 (0.31-0.80)  | <b>&lt;0.01</b> |
| I'm afraid of needles                                      | 4  | 4  | 5  | 1.27 (0.61-2.64)  | 0.52            |
| I prefer alternative (homeopathic)<br>medicine to vaccines | 11 | 15 | 7  | 0.43 (0.26-0.71)  | <b>&lt;0.01</b> |
| I have never had the flu                                   | 13 | 13 | 13 | 0.93 (0.60-1.43)  | 0.73            |
| The vaccine will make me sick with the<br>flu              | 9  | 12 | 7  | 0.55 (0.34-0.89)  | <b>0.01</b>     |
| I got a flu shot the year before so I didn't<br>need it    | 2  | 4  | 1  | 0.24 (0.10-0.55)  | <b>&lt;0.01</b> |
| Another reason                                             | 27 | 27 | 26 | 0.95 (0.68-1.33)  | 0.76            |

Red text indicates survey items reflecting negative vaccine attitudes

<sup>a</sup> Column percentages (of total sample), weighted according to survey weights to achieve national representativeness

<sup>b</sup> Column percentages (of vaccinated/unvaccinated) (except for first row "All" which is a row percentage), weighted according to survey weights to achieve national representativeness

<sup>c</sup> using the Pearson chi-square test at significance level of  $\alpha=5\%$ ; bold indicates statistical significance ( $p<0.05$ ). For non-dichotomous categorical variables, p-values for differences between all categories included in top row with variable name, and p-values for differences between individual categories and reference category included in individual category row.

<sup>e</sup> Likert scale response options (strongly agree, agree, disagree, strongly disagree, don't know) dichotomized to agree/disagree (don't know coded as disagree), results for agreement shown; other scale response options dichotomized to reflect affirmative/negative, results for affirmative shown

<sup>i</sup> asked only to respondents reporting not receiving the flu shot

<sup>j</sup> Odds Ratio (95% Confidence Interval) of being vaccinated vs unvaccinated for affirmative survey response vs not

<sup>k</sup> Reference category for logistic regression of categorical variables
