# Supplementary material for: COVID-19 Vaccination Status, Attitudes, and Values among US Adults in September 2021
Source: MDPI journal article supplement (doi:10.3390/jcm11133734), 2022-06-28
Supplement: s1 [file s1]

**Table S13. Race/Ethnicity by Political Activities and Support, Sources of Health Information, and Reasons For Not Getting the Flu Vaccine**

Numbers in the "Total" column indicate the percentage of the total weighted sample providing the September 2021 survey response in each row. Numbers in the "Race/Ethnicity" columns indicate the percentage of those whose race/ethnicity match that of the column header who provided the survey response in each row. The numbers in the final column indicate the p-value of this association, boldface indicating statistical significance ( $p < 0.05$ ).

| Survey Items                                                                                 | Race/Ethnicity (%) <sup>b</sup> |                     |                     |          |                     | p-value <sup>c</sup> |
|----------------------------------------------------------------------------------------------|---------------------------------|---------------------|---------------------|----------|---------------------|----------------------|
|                                                                                              | Total (%) <sup>a</sup>          | White, non-Hispanic | Black, non-Hispanic | Hispanic | Other, non-Hispanic |                      |
| All                                                                                          | 100                             | 63                  | 12                  | 17       | 8                   |                      |
| <b>Affirmative Responses to Survey Items</b>                                                 |                                 |                     |                     |          |                     |                      |
| <sup>c</sup>                                                                                 |                                 |                     |                     |          |                     |                      |
| <i>Political Activities and Support</i>                                                      |                                 |                     |                     |          |                     |                      |
| People may be involved in civic and political activities. In the past 12 months, have you... |                                 |                     |                     |          |                     |                      |
| Attended a political protest or rally                                                        | 7                               | 7                   | 7                   | 4        | 10                  | 0.08                 |
| Contacted a government official                                                              | 15                              | 19                  | 8                   | 10       | 13                  | <b>&lt;0.01</b>      |
| Volunteered or worked for a                                                                  |                                 |                     |                     |          |                     |                      |
| Presidential campaign                                                                        | 3                               | 3                   | 2                   | 3        | 3                   | 0.93                 |
| Volunteered or worked for a political candidate other than a Presidential campaign           | 2                               | 3                   | 3                   | 1        | 3                   | 0.64                 |
| Volunteered or worked for a political party, issue, or cause                                 | 4                               | 4                   | 4                   | 3        | 5                   | 0.53                 |
| Served on a committee for a civic, non-                                                      | 5                               | 6                   | 6                   | 2        | 5                   | 0.15                 |

|                                           |    |    |    |    |    |                 |
|-------------------------------------------|----|----|----|----|----|-----------------|
| profit or community organization          |    |    |    |    |    |                 |
| Written a letter or email to a            |    |    |    |    |    |                 |
| newspaper/magazine or called a live       |    |    |    |    |    |                 |
| radio or TV show                          | 4  | 5  | 3  | 2  | 4  | 0.27            |
| Commented about politics on a message     |    |    |    |    |    |                 |
| board or internet site                    | 19 | 21 | 14 | 16 | 20 | <b>0.02</b>     |
| Shared your opinion about a town or       |    |    |    |    |    |                 |
| community issue at a public meeting       | 4  | 4  | 4  | 5  | 4  | 0.98            |
| Held a publicly elected office            | <1 | <1 | <1 | <1 | <1 | 0.86            |
| Signed a petition                         | 26 | 26 | 24 | 24 | 29 | 0.57            |
| Ran for a publicly elected office         | <1 | <1 | <1 | <1 | <1 | 0.59            |
| None of these                             | 60 | 59 | 62 | 67 | 59 | <b>0.04</b>     |
| Do you identify with or actively support  |    |    |    |    |    |                 |
| any of the following political movements? |    |    |    |    |    |                 |
| Tea Party (Taxed Enough Already)          | 6  | 8  | 3  | 3  | 6  | <b>&lt;0.01</b> |
| Environmental Rights                      | 20 | 19 | 20 | 21 | 24 | 0.51            |
| Women's Rights/ Me Too                    | 23 | 21 | 33 | 21 | 32 | <b>&lt;0.01</b> |
| Racial Equality                           | 26 | 23 | 46 | 23 | 32 | <b>&lt;0.01</b> |
| Right to Life                             | 15 | 16 | 13 | 12 | 12 | 0.21            |
| Peace/Anti-War                            | 11 | 11 | 12 | 12 | 12 | 0.86            |
| Lesbian, Gay, Bisexual, Transgender,      |    |    |    |    |    |                 |
| Queer (LGBTQ) Rights                      | 19 | 19 | 19 | 19 | 23 | 0.69            |
| Indivisible                               | 2  | 2  | 2  | 1  | 3  | 0.37            |
| Black Lives Matter                        | 25 | 20 | 52 | 22 | 33 | <b>&lt;0.01</b> |
| Men's Rights                              | 4  | 3  | 8  | 5  | 3  | <b>0.03</b>     |
| Alt-right                                 | 1  | 1  | 1  | <1 | 1  | 0.72            |
| Boogaloo movement                         | <1 | <1 | 0  | <1 | 0  | 0.68            |
| Antifa                                    | 2  | 2  | 2  | 3  | 1  | 0.60            |

|                                                                                 |    |    |    |    |    |                 |
|---------------------------------------------------------------------------------|----|----|----|----|----|-----------------|
| QAnon                                                                           | 1  | 1  | <1 | <1 | 1  | <b>0.03</b>     |
| Anti-gun violence                                                               | 16 | 14 | 23 | 17 | 20 | <b>0.01</b>     |
| None of these                                                                   | 53 | 54 | 38 | 60 | 46 | <b>&lt;0.01</b> |
| Do you identify with or actively support<br>any of the following organizations? |    |    |    |    |    |                 |
| National Rifle Association (NRA)                                                | 13 | 17 | 3  | 7  | 9  | <b>&lt;0.01</b> |
| Heritage Foundation                                                             | 3  | 4  | 4  | 3  | 2  | 0.79            |
| Planned Parenthood                                                              | 19 | 18 | 21 | 16 | 26 | 0.08            |
| National Right to Life Committee                                                | 5  | 6  | 2  | 4  | 4  | <b>0.03</b>     |
| Greenpeace                                                                      | 6  | 6  | 8  | 6  | 6  | 0.88            |
| Sierra Club                                                                     | 8  | 8  | 4  | 6  | 10 | 0.11            |
| Amnesty International                                                           | 6  | 6  | 6  | 6  | 7  | 0.91            |
| National Education Association<br>Foundation                                    | 6  | 7  | 8  | 4  | 6  | 0.30            |
| American Civil Liberties Union (ACLU)                                           | 12 | 12 | 13 | 10 | 13 | 0.62            |
| Americans for Prosperity                                                        | 1  | 1  | 2  | 1  | 1  | 0.58            |
| MoveOn.org                                                                      | 7  | 7  | 6  | 5  | 8  | 0.52            |
| The NAACP/National Association for<br>the Advancement of Colored People         | 12 | 8  | 40 | 10 | 10 | <b>&lt;0.01</b> |
| American Red Cross                                                              | 23 | 23 | 26 | 18 | 25 | 0.21            |
| Chamber of Commerce                                                             | 3  | 3  | 4  | 3  | 3  | 0.84            |
| Freedom Caucus                                                                  | 2  | 2  | 4  | 2  | 1  | 0.08            |
| None of these                                                                   | 53 | 51 | 49 | 63 | 52 | <b>&lt;0.01</b> |

#### *Sources of Health Information*

Which of the following sources have you  
used to look for health and wellness  
related information or education in the

past 12 months?

|                                                                                   |    |    |    |    |    |                 |
|-----------------------------------------------------------------------------------|----|----|----|----|----|-----------------|
| Doctor                                                                            | 60 | 64 | 55 | 49 | 60 | <b>&lt;0.01</b> |
| Pharmacist                                                                        | 21 | 23 | 19 | 17 | 20 | 0.13            |
| Nurse, nurse practitioner or physician's assistant                                | 29 | 33 | 24 | 18 | 19 | <b>&lt;0.01</b> |
| Relative, friend or co-worker                                                     | 23 | 24 | 21 | 19 | 29 | 0.11            |
| Someone you know who has a particular medical condition                           | 8  | 9  | 8  | 8  | 7  | 0.71            |
| Disease-related association or society                                            | 5  | 6  | 5  | 5  | 7  | 0.84            |
| Patient support group or foundation                                               | 2  | 2  | 2  | 2  | 1  | 0.87            |
| Educational forum at a local clinic, hospital, community center or other location | 3  | 2  | 6  | 5  | 5  | <b>0.01</b>     |
| Pharmaceutical company                                                            | 1  | 1  | 3  | <1 | 0  | <b>0.03</b>     |
| Health insurance company                                                          | 7  | 6  | 9  | 7  | 7  | 0.43            |
| Newspapers or magazines                                                           | 7  | 6  | 8  | 6  | 8  | 0.40            |
| Television                                                                        | 6  | 5  | 11 | 10 | 3  | <b>&lt;0.01</b> |
| The internet                                                                      | 48 | 49 | 41 | 47 | 53 | 0.10            |
| Social Media (such as Facebook, Twitter)                                          | 6  | 5  | 4  | 10 | 5  | <b>0.01</b>     |
| Healthcare app for smartphone or tablet                                           | 6  | 5  | 7  | 7  | 7  | 0.38            |
| Have not looked for information in the past 12 months                             | 21 | 20 | 22 | 22 | 17 | 0.60            |

### *Barriers, Specific Concerns and Other Reasons*

#### *For Not Getting the Flu Vaccine*

Of those who did not get a flu shot this

past year: this is because... <sup>i</sup>

|                                                            |    |    |    |    |    |                 |
|------------------------------------------------------------|----|----|----|----|----|-----------------|
| The flu is not a serious illness                           | 9  | 13 | 2  | 4  | 11 | <b>&lt;0.01</b> |
| I'm healthy                                                | 22 | 24 | 14 | 22 | 30 | 0.07            |
| I just didn't think about it                               | 22 | 22 | 21 | 22 | 30 | 0.52            |
| I didn't know where to get it                              | 1  | 1  | 1  | 3  | 0  | 0.11            |
| I didn't have health insurance                             | 3  | 2  | 5  | 6  | 1  | <b>0.02</b>     |
| I didn't have time                                         | 5  | 4  | 2  | 9  | 9  | <b>0.04</b>     |
| I don't believe in vaccines                                | 6  | 7  | 8  | 4  | 1  | 0.06            |
| I'm afraid of the side effects                             | 11 | 10 | 14 | 9  | 19 | 0.09            |
| I'm afraid of needles                                      | 4  | 5  | 6  | 4  | 1  | 0.40            |
| I prefer alternative (homeopathic)<br>medicine to vaccines | 11 | 12 | 8  | 10 | 11 | 0.63            |
| I have never had the flu                                   | 13 | 15 | 12 | 10 | 11 | 0.45            |
| The vaccine will make me sick with the<br>flu              | 9  | 9  | 13 | 8  | 9  | 0.46            |
| I got a flu shot the year before so I<br>didn't need it    | 2  | 2  | 5  | 3  | 2  | 0.15            |
| Another reason                                             | 27 | 29 | 31 | 21 | 19 | 0.11            |

Red text indicates survey items reflecting negative vaccine attitudes

<sup>a</sup> Column percentages (of total sample), weighted according to survey weights to achieve national representativeness

<sup>b</sup> Column percentages (of race/ethnicity) (except for first row "All" which is a row percentage), weighted according to survey weights to achieve national representativeness

<sup>c</sup> using the Pearson chi-square test at significance level of alpha=5%; bold indicates statistical significance (p<0.05)

<sup>e</sup> Likert scale response options (strongly agree, agree, disagree, strongly disagree, don't know) dichotomized to agree/disagree (don't know coded as disagree), results for agreement shown; other scale response options dichotomized to reflect affirmative/negative, results for affirmative shown

<sup>i</sup> asked only to respondents reporting not receiving the flu shot
