# Supplementary material for: COVID-19 Vaccination Status, Attitudes, and Values among US Adults in September 2021
Source: MDPI journal article supplement (doi:10.3390/jcm11133734), 2022-06-28
Supplement: s1 [file s1]

**Table S3. Frequency and Odds of COVID-19 Vaccination among Hesitant by Vaccine Attitudes, Trust in CDC and HDs, and Sociodemographic**

**Characteristics**

*Numbers in the "Total" column indicate the percentage of the hesitant (either unvaccinated or vaccinated after hesitation) weighted sample providing the September 2021 survey response in each row.*

*Numbers in the "Hesitation Prior to Vaccination" columns indicate the percentage of those whose amount of hesitation prior to receiving the COVID-19 vaccine match that of the column header*

*who provided the survey response in each row. The numbers in the "OR (95%CI)" columns indicate the Odds Ratio comparing the different amounts of hesitation matching that of the column*

*header by the survey response in each row. The numbers in the "P-value" columns indicate the p-value of the associations described in the columns to the left, boldface indicating statistical significance ( $p < 0.05$ ).*

| Survey Items                                | Hesitation Prior to |                             |       |              | Some Hesitation vs. |                         | A Lot of Hesitation vs. |                         |                    |
|---------------------------------------------|---------------------|-----------------------------|-------|--------------|---------------------|-------------------------|-------------------------|-------------------------|--------------------|
|                                             | Total               | Vaccination, % <sup>b</sup> |       |              | Unvaccinated        |                         | Unvaccinated            |                         |                    |
|                                             | Hesitant            | A                           | Still | p-           | p-                  |                         | p-                      |                         |                    |
|                                             | (%) <sup>a</sup>    | Some                        | Lot   | Unvaccinated | value <sup>c</sup>  | OR (95%CI) <sup>i</sup> | value <sup>c</sup>      | OR (95%CI) <sup>i</sup> | value <sup>c</sup> |
| All                                         | 100                 | 37                          | 17    | 46           |                     |                         |                         |                         |                    |
| <b>Constructs <sup>d</sup></b>              |                     |                             |       |              |                     |                         |                         |                         |                    |
| Confidence in vaccines                      | 36                  | 65                          | 27    | 16           | <b>&lt;0.01</b>     | 9.47 (6.58-13.64)       | <b>&lt;0.01</b>         | 1.91 (1.21-3.03)        | <b>0.01</b>        |
| Trust in the Centers for Disease Control    |                     |                             |       |              |                     |                         |                         |                         |                    |
| and Prevention (CDC)                        | 24                  | 42                          | 23    | 11           | <b>&lt;0.01</b>     | 5.98 (4.06-8.80)        | <b>&lt;0.01</b>         | 2.54 (1.56-4.14)        | <b>&lt;0.01</b>    |
| Trust in local and state health departments |                     |                             |       |              |                     |                         |                         |                         |                    |
| (HDs)                                       | 28                  | 44                          | 25    | 17           | <b>&lt;0.01</b>     | 3.69 (2.60-5.24)        | <b>&lt;0.01</b>         | 1.60 (1.02-2.49)        | <b>0.04</b>        |

## Sociodemographic Characteristics

|                      |    |    |    |    |       |                  |       |                  |       |
|----------------------|----|----|----|----|-------|------------------|-------|------------------|-------|
| Gender               |    |    |    |    | 0.53  |                  |       |                  |       |
| Female               | 55 | 55 | 59 | 53 |       | ref <sup>k</sup> |       | ref <sup>k</sup> |       |
| Male                 | 45 | 45 | 41 | 47 |       | 0.95 (0.70-1.29) | 0.73  | 0.80 (0.54-1.18) | 0.26  |
| Age (years)          |    |    |    |    | <0.01 |                  |       |                  |       |
| 18-29                | 25 | 22 | 16 | 30 |       | ref <sup>k</sup> |       | ref <sup>k</sup> |       |
| 30-44                | 30 | 27 | 31 | 32 |       | 1.18 (0.75-1.84) | 0.48  | 1.86 (1.01-3.44) | 0.05  |
| 45-59                | 25 | 26 | 30 | 22 |       | 1.59 (1.01-2.51) | 0.05  | 2.63 (1.42-4.86) | <0.01 |
| 60+                  | 20 | 26 | 23 | 15 |       | 2.36 (1.48-3.76) | <0.01 | 2.92 (1.55-5.52) | <0.01 |
| Education (attained) |    |    |    |    | <0.01 |                  |       |                  |       |
| <High School         | 12 | 10 | 12 | 13 |       | ref <sup>k</sup> |       | ref <sup>k</sup> |       |
| High School          | 34 | 29 | 32 | 38 |       | 0.99 (0.58-1.67) | 0.96  | 0.91 (0.48-1.74) | 0.78  |
| Some College         | 29 | 27 | 28 | 31 |       | 1.12 (0.66-1.89) | 0.68  | 0.97 (0.51-1.84) | 0.93  |
| Bachelors or Higher  | 25 | 34 | 28 | 17 |       | 2.51 (1.45-4.36) | <0.01 | 1.79 (0.92-3.50) | 0.09  |
| Race/Ethnicity       |    |    |    |    | 0.01  |                  |       |                  |       |
| White, non-Hispanic  | 60 | 54 | 62 | 64 |       | ref <sup>k</sup> |       | ref <sup>k</sup> |       |
| Black, non-Hispanic  | 16 | 15 | 17 | 15 |       | 1.16 (0.81-1.66) | 0.42  | 1.18 (0.74-1.88) | 0.48  |

|                                                           |    |    |    |    |                 |                  |                 |                  |             |
|-----------------------------------------------------------|----|----|----|----|-----------------|------------------|-----------------|------------------|-------------|
| Hispanic                                                  | 17 | 20 | 15 | 16 |                 | 1.53 (1.08-2.18) | <b>0.02</b>     | 1.00 (0.63-1.57) | 0.98        |
| Other, non-Hispanic                                       | 7  | 11 | 6  | 5  |                 | 2.84 (1.41-5.69) | <b>&lt;0.01</b> | 1.31 (0.49-3.50) | 0.59        |
| Region                                                    |    |    |    |    | 0.07            |                  |                 |                  |             |
| Northeast                                                 | 17 | 17 | 24 | 14 |                 | ref <sup>k</sup> |                 | ref <sup>k</sup> |             |
| Midwest                                                   | 21 | 18 | 24 | 22 |                 | 0.66 (0.39-1.11) | 0.11            | 0.64 (0.36-1.15) | 0.14        |
| South                                                     | 39 | 39 | 34 | 42 |                 | 0.76 (0.49-1.19) | 0.23            | 0.49 (0.29-0.83) | <b>0.01</b> |
| West                                                      | 23 | 25 | 18 | 22 |                 | 0.94 (0.57-1.53) | 0.80            | 0.50 (0.27-0.90) | <b>0.02</b> |
| Metropolitan Statistical Area status (metro vs non-metro) | 84 | 88 | 85 | 81 | 0.10            | 1.66 (1.03-2.67) | <b>0.04</b>     | 1.29 (0.73-2.26) | 0.38        |
| Employment status (working vs not working)                | 66 | 65 | 65 | 66 | 0.97            | 0.97 (0.71-1.33) | 0.84            | 0.96 (0.65-1.44) | 0.86        |
| Household income                                          |    |    |    |    | <b>&lt;0.01</b> |                  |                 |                  |             |
| <\$50k                                                    | 38 | 35 | 31 | 43 |                 | ref <sup>k</sup> |                 | ref <sup>k</sup> |             |
| \$50-85k                                                  | 33 | 31 | 39 | 31 |                 | 1.24 (0.87-1.78) | 0.23            | 1.76 (1.12-2.75) | <b>0.01</b> |
| \$85-150k                                                 | 17 | 15 | 19 | 18 |                 | 1.05 (0.66-1.66) | 0.85            | 1.49 (0.84-2.63) | 0.17        |
| \$150k+                                                   | 12 | 18 | 11 | 8  |                 | 2.83 (1.72-4.65) | <b>&lt;0.01</b> | 1.90 (0.96-3.76) | 0.07        |

|                                    |    |    |     |     |                 |                  |                 |                  |             |
|------------------------------------|----|----|-----|-----|-----------------|------------------|-----------------|------------------|-------------|
| Household size                     |    |    |     |     | <b>0.01</b>     |                  |                 |                  |             |
| 1                                  | 15 | 16 | 19  | 12  |                 | ref <sup>k</sup> |                 | ref <sup>k</sup> |             |
| 2                                  | 31 | 33 | 39  | 27  |                 | 0.89 (0.56-1.41) | 0.61            | 0.91 (0.53-1.56) | 0.72        |
| 3                                  | 19 | 18 | 15  | 22  |                 | 0.61 (0.37-1.03) | 0.06            | 0.43 (0.22-0.83) | <b>0.01</b> |
| 4+                                 | 35 | 33 | 27  | 38  |                 | 0.64 (0.41-1.02) | 0.06            | 0.45 (0.25-0.79) | <b>0.01</b> |
| Number of children (ages 2-17)     |    |    |     |     | 0.09            |                  |                 |                  |             |
| 0                                  |    |    |     |     |                 | ref <sup>k</sup> |                 | ref <sup>k</sup> |             |
| 1                                  | 67 | 68 | 100 | 1   |                 | 0.76 (0.48-1.21) | 0.25            | 0.73 (0.40-1.34) | 0.31        |
| 2                                  | 13 | 11 | 76  | 100 |                 | 0.82 (0.52-1.30) | 0.40            | 0.46 (0.24-0.91) | <b>0.02</b> |
| 3+                                 | 12 | 13 | 12  | 62  |                 | 0.76 (0.44-1.30) | 0.31            | 0.35 (0.15-0.78) | <b>0.01</b> |
| Political affiliation              |    |    |     |     | <b>&lt;0.01</b> |                  |                 |                  |             |
| Republican                         | 32 | 27 | 35  | 34  |                 | ref <sup>k</sup> |                 | ref <sup>k</sup> |             |
| Democrat                           | 25 | 32 | 22  | 19  |                 | 2.09 (1.40-3.12) | <b>&lt;0.01</b> | 1.13 (0.67-1.88) | 0.65        |
| Independent                        | 30 | 29 | 26  | 32  |                 | 1.15 (0.77-1.73) | 0.49            | 0.78 (0.48-1.28) | 0.33        |
| Something else                     | 14 | 11 | 17  | 15  |                 | 0.88 (0.53-1.46) | 0.62            | 1.05 (0.59-1.87) | 0.87        |
| Physical health (good vs not good) | 83 | 82 | 78  | 84  | 0.22            | 0.85 (0.57-1.26) | 0.41            | 0.66 (0.41-1.06) | 0.09        |

## Affirmative Responses to Survey Items <sup>c</sup>

### *COVID-19 Disease*

|                                                                                                     |    |    |    |    |                 |                  |                 |                  |                 |
|-----------------------------------------------------------------------------------------------------|----|----|----|----|-----------------|------------------|-----------------|------------------|-----------------|
| Have you ever had COVID-19?                                                                         | 24 | 17 | 22 | 30 | <b>&lt;0.01</b> | 0.47 (0.31-0.70) | <b>&lt;0.01</b> | 0.64 (0.39-1.03) | 0.06            |
| How likely do you think it is that you will have COVID-19 over the next year?                       | 22 | 18 | 22 | 24 | 0.19            | 0.70 (0.48-1.03) | 0.07            | 0.87 (0.54-1.40) | 0.57            |
| When indoors in a crowded setting do you (or would you) wear a mask?                                | 73 | 86 | 79 | 60 | <b>&lt;0.01</b> | 4.17 (2.84-6.13) | <b>&lt;0.01</b> | 2.52 (1.59-4.00) | <b>&lt;0.01</b> |
| I am concerned that I or my family/friends will be exposed when others do not wear masks in public. | 46 | 61 | 43 | 35 | <b>&lt;0.01</b> | 2.85 (2.06-3.95) | <b>&lt;0.01</b> | 1.35 (0.90-2.01) | 0.14            |

### *COVID-19 Vaccine*

|                                                                                             |    |    |    |    |                 |                     |                 |                  |                 |
|---------------------------------------------------------------------------------------------|----|----|----|----|-----------------|---------------------|-----------------|------------------|-----------------|
| How important do you think a COVID-19 vaccine is to stop the spread of infection in the US? | 65 | 96 | 76 | 37 | <b>&lt;0.01</b> | 38.29 (20.31-72.19) | <b>&lt;0.01</b> | 5.37 (3.47-8.31) | <b>&lt;0.01</b> |
| Are you worried that the COVID-19 vaccine is not safe for adults?                           | 49 | 16 | 50 | 74 | <b>&lt;0.01</b> | 0.07 (0.05-0.10)    | <b>&lt;0.01</b> | 0.35 (0.23-0.52) | <b>&lt;0.01</b> |
| Have you discussed getting vaccinated with your healthcare provider?                        | 32 | 34 | 36 | 28 | 0.10            | 1.34 (0.96-1.85)    | 0.08            | 1.46 (0.97-2.19) | 0.07            |
| Of those who have: the provider                                                             | 49 | 66 | 52 | 32 | <b>&lt;0.01</b> | 4.11 (2.30-7.35)    | <b>&lt;0.01</b> | 2.32 (1.17-4.58) | <b>0.02</b>     |

encouraged getting the vaccine.

*COVID-19 in Children*

COVID-19 can be a serious disease for  
some children.

|    |    |    |    |       |                  |       |                  |       |
|----|----|----|----|-------|------------------|-------|------------------|-------|
| 77 | 89 | 83 | 65 | <0.01 | 4.43 (2.89-6.80) | <0.01 | 2.64 (1.64-4.23) | <0.01 |
|----|----|----|----|-------|------------------|-------|------------------|-------|

I am concerned about the safety of  
COVID-19 vaccine in children.

|    |    |    |    |       |                  |       |                  |      |
|----|----|----|----|-------|------------------|-------|------------------|------|
| 82 | 73 | 85 | 87 | <0.01 | 0.41 (0.28-0.62) | <0.01 | 0.89 (0.52-1.52) | 0.66 |
|----|----|----|----|-------|------------------|-------|------------------|------|

Vaccinating children against COVID-19 is  
important to end the pandemic and get  
back to normal.

|    |    |    |    |       |                    |       |                  |       |
|----|----|----|----|-------|--------------------|-------|------------------|-------|
| 48 | 79 | 52 | 22 | <0.01 | 13.67 (9.45-19.79) | <0.01 | 3.88 (2.59-5.82) | <0.01 |
|----|----|----|----|-------|--------------------|-------|------------------|-------|

It is better for children to develop  
immunity to COVID-19 by getting sick  
rather than by getting a shot.

|    |    |    |    |       |                  |       |                  |       |
|----|----|----|----|-------|------------------|-------|------------------|-------|
| 47 | 22 | 46 | 67 | <0.01 | 0.14 (0.10-0.19) | <0.01 | 0.41 (0.28-0.61) | <0.01 |
|----|----|----|----|-------|------------------|-------|------------------|-------|

COVID-19 in children is no worse than a  
cold or the flu.

|    |    |    |    |       |                  |       |                  |       |
|----|----|----|----|-------|------------------|-------|------------------|-------|
| 47 | 30 | 47 | 62 | <0.01 | 0.26 (0.19-0.36) | <0.01 | 0.56 (0.38-0.82) | <0.01 |
|----|----|----|----|-------|------------------|-------|------------------|-------|

*Vaccines Other than COVID-19*

Had flu vaccination, past 12 months.

|    |    |    |    |       |                  |       |                  |       |
|----|----|----|----|-------|------------------|-------|------------------|-------|
| 35 | 54 | 38 | 18 | <0.01 | 5.42 (3.82-7.69) | <0.01 | 2.85 (1.87-4.36) | <0.01 |
|----|----|----|----|-------|------------------|-------|------------------|-------|

Of parents: Have you ever delayed having  
your child get a shot other than the flu for

|    |    |   |    |       |                  |       |                  |      |
|----|----|---|----|-------|------------------|-------|------------------|------|
| 21 | 12 | 9 | 30 | <0.01 | 0.31 (0.15-0.63) | <0.01 | 0.24 (0.07-0.76) | 0.02 |
|----|----|---|----|-------|------------------|-------|------------------|------|

reasons other than illness or allergy?

Of parents: Have you ever decided not to  
have your child get a shot other than the

|                                                                          |    |   |    |    |                 |                  |                 |                  |                 |
|--------------------------------------------------------------------------|----|---|----|----|-----------------|------------------|-----------------|------------------|-----------------|
| flu for reasons other than illness or allergy?                           | 16 | 9 | 12 | 21 | <b>0.03</b>     | 0.38 (0.17-0.84) | <b>0.02</b>     | 0.51 (0.18-1.46) | 0.21            |
| Have you or anyone you know ever had a<br>serious reaction to a vaccine? | 15 | 5 | 12 | 24 | <b>&lt;0.01</b> | 0.18 (0.11-0.30) | <b>&lt;0.01</b> | 0.43 (0.24-0.76) | <b>&lt;0.01</b> |

*Healthcare and Science in General*

Received high quality care from healthcare  
provider, past 12 months.

|                                                      |    |    |    |    |                 |                  |                 |                  |      |
|------------------------------------------------------|----|----|----|----|-----------------|------------------|-----------------|------------------|------|
| In general, would you say that you trust<br>science? | 87 | 91 | 82 | 86 | <b>0.01</b>     | 1.80 (1.07-3.02) | <b>0.03</b>     | 0.75 (0.42-1.33) | 0.32 |
|                                                      | 83 | 92 | 81 | 77 | <b>&lt;0.01</b> | 3.42 (2.12-5.53) | <b>&lt;0.01</b> | 1.26 (0.79-2.02) | 0.32 |

*Political Activities and Support*

People may be involved in civic and  
political activities. In the past 12 months,  
have you...

|                                          |    |    |    |    |      |                  |      |                  |      |
|------------------------------------------|----|----|----|----|------|------------------|------|------------------|------|
| Attended a political protest or rally    | 5  | 45 | 11 | 44 | 0.38 | 1.32 (0.65-2.72) | 0.44 | 0.66 (0.25-1.76) | 0.41 |
| Contacted a government official          | 12 | 34 | 17 | 49 | 0.78 | 0.85 (0.53-1.37) | 0.51 | 0.88 (0.49-1.6)  | 0.68 |
| Volunteered or worked for a Presidential | 1  | 30 | 16 | 54 | 0.85 | 0.7 (0.21-2.36)  | 0.57 | 0.78 (0.14-4.22) | 0.77 |

| Activity                                                                            | Percent of respondents | Percent of respondents who are white | Percent of respondents who are black | Percent of respondents who are Asian | Percent of respondents who are Hispanic | Percent of respondents who are other races | Percent of respondents who are white | Percent of respondents who are black | Percent of respondents who are Asian | Percent of respondents who are Hispanic | Percent of respondents who are other races |
|-------------------------------------------------------------------------------------|------------------------|--------------------------------------|--------------------------------------|--------------------------------------|-----------------------------------------|--------------------------------------------|--------------------------------------|--------------------------------------|--------------------------------------|-----------------------------------------|--------------------------------------------|
| Volunteered or worked for a political candidate other than a Presidential campaign  | 1                      | 25                                   | 30                                   | 46                                   | 0.47                                    | 0.68 (0.17-2.79)                           | 0.60                                 | 1.73 (0.40-7.41)                     | 0.46                                 |                                         |                                            |
| Volunteered or worked for a political party, issue, or cause                        | 2                      | 35                                   | 17                                   | 49                                   | 0.98                                    | 0.9 (0.33-2.5)                             | 0.84                                 | 0.9 (0.25-3.29)                      | 0.88                                 |                                         |                                            |
| Served on a committee for a civic, non-profit or community organization             | 3                      | 40                                   | 14                                   | 46                                   | 0.85                                    | 1.11 (0.51-2.4)                            | 0.80                                 | 0.82 (0.31-2.2)                      | 0.70                                 |                                         |                                            |
| Written a letter or email to a newspaper/magazine or called a live radio or TV show | 4                      | 30                                   | 18                                   | 51                                   | 0.72                                    | 0.73 (0.34-1.59)                           | 0.43                                 | 0.93 (0.37-2.31)                     | 0.87                                 |                                         |                                            |
| Commented about politics on a message board or internet site                        | 17                     | 34                                   | 17                                   | 49                                   | 0.68                                    | 0.84 (0.56-1.26)                           | 0.39                                 | 0.93 (0.57-1.51)                     | 0.77                                 |                                         |                                            |
| Shared your opinion about a town or community issue at a public meeting             | 4                      | 39                                   | 16                                   | 45                                   | 0.93                                    | 1.11 (0.50-2.46)                           | 0.81                                 | 0.91 (0.31-2.69)                     | 0.86                                 |                                         |                                            |
| Held a publicly elected office                                                      | 0                      | 28                                   | 0                                    | 72                                   | 0.63                                    | 0.49 (0.04-6.24)                           | 0.58                                 |                                      |                                      |                                         |                                            |
| Signed a petition                                                                   | 24                     | 38                                   | 18                                   | 44                                   | 0.80                                    | 1.12 (0.79-1.59)                           | 0.52                                 | 1.09 (0.71-1.69)                     | 0.68                                 |                                         |                                            |
| Ran for a publicly elected office                                                   | 0                      | 100                                  | 0                                    | 0                                    | 0.46                                    |                                            |                                      |                                      |                                      |                                         |                                            |
| None of these                                                                       | 64                     | 37                                   | 17                                   | 46                                   | 0.98                                    | 1 (0.73-1.37)                              | 0.99                                 | 0.96 (0.65-1.42)                     | 0.84                                 |                                         |                                            |



any of the following political movements?

|                                      |    |    |    |    |                 |                     |                 |                     |             |
|--------------------------------------|----|----|----|----|-----------------|---------------------|-----------------|---------------------|-------------|
| Tea Party (Taxed Enough Already)     | 9  | 31 | 19 | 51 | 0.56            | 0.74 (0.41-1.32)    | 0.30            | 0.96 (0.49-1.9)     | 0.92        |
| Environmental Rights                 | 13 | 48 | 14 | 38 | <b>0.02</b>     | 1.69 (1.08-2.65)    | <b>0.02</b>     | 0.94 (0.52-1.69)    | 0.84        |
| Women's Rights/ Me Too               | 17 | 45 | 15 | 40 | 0.07            | 1.52 (1.02-2.27)    | 0.04            | 1 (0.58-1.71)       | 1.00        |
| Racial Equality                      | 21 | 48 | 14 | 38 | <b>&lt;0.01</b> | 1.78 (1.23-2.56)    | <b>&lt;0.01</b> | 0.99 (0.61-1.61)    | 0.96        |
| Right to Life                        | 19 | 30 | 15 | 54 | 0.05            | 0.64 (0.43-0.94)    | <b>0.02</b>     | 0.7 (0.42-1.15)     | 0.15        |
| Peace/Anti-War                       | 10 | 51 | 13 | 36 | <b>0.02</b>     | 1.88 (1.15-3.06)    | <b>0.01</b>     | 0.95 (0.46-1.98)    | 0.90        |
| Lesbian, Gay, Bisexual, Transgender, |    |    |    |    |                 |                     |                 |                     |             |
| Queer (LGBTQ) Rights                 | 13 | 47 | 17 | 36 | <b>0.04</b>     | 1.8 (1.11-2.91)     | <b>0.02</b>     | 1.3 (0.71-2.39)     | 0.40        |
| Indivisible                          | 2  | 44 | 1  | 55 | 0.18            | 1.01 (0.31-3.27)    | 0.99            | 0.07 (0.01-0.58)    | <b>0.01</b> |
| Black Lives Matter                   | 18 | 45 | 15 | 40 | <b>0.04</b>     | 1.55 (1.06-2.26)    | <b>0.02</b>     | 0.96 (0.58-1.58)    | 0.88        |
| Men's Rights                         | 5  | 36 | 15 | 49 | 0.88            | 0.91 (0.45-1.86)    | 0.80            | 0.8 (0.33-1.91)     | 0.61        |
| Alt-right                            | 1  | 0  | 16 | 84 | 0.11            |                     |                 | 0.52 (0.08-3.42)    | 0.49        |
| Boogaloo movement                    | 0  | 0  | 47 | 53 | 0.32            |                     |                 | 2.31 (0.20-26.22)   | 0.50        |
| Antifa                               | 1  | 84 | 13 | 2  | <b>&lt;0.01</b> | 43.44 (5.37-351.23) | <b>&lt;0.01</b> | 14.32 (1.28-160.03) | <b>0.03</b> |
| QAnon                                | 2  | 15 | 13 | 71 | 0.17            | 0.27 (0.06-1.28)    | 0.10            | 0.50 (0.10-2.45)    | 0.39        |
| Anti-gun violence                    | 10 | 53 | 16 | 31 | <b>&lt;0.01</b> | 2.33 (1.45-3.74)    | <b>&lt;0.01</b> | 1.42 (0.74-2.7)     | 0.29        |
| None of these                        | 56 | 35 | 19 | 45 | 0.22            | 0.94 (0.69-1.28)    | 0.69            | 1.33 (0.90-1.96)    | 0.15        |

Do you identify with or actively support

any of the following organizations?

|                                                                         |    |    |    |    |             |                  |             |                  |      |
|-------------------------------------------------------------------------|----|----|----|----|-------------|------------------|-------------|------------------|------|
| National Rifle Association (NRA)                                        | 18 | 28 | 17 | 55 | <b>0.03</b> | 0.57 (0.38-0.86) | <b>0.01</b> | 0.81 (0.49-1.33) | 0.41 |
| Heritage Foundation                                                     | 4  | 43 | 24 | 33 | 0.28        | 1.63 (0.75-3.55) | 0.22        | 1.99 (0.77-5.16) | 0.15 |
| Planned Parenthood                                                      | 12 | 44 | 15 | 41 | 0.29        | 1.40 (0.89-2.21) | 0.14        | 1.00 (0.53-1.87) | 0.99 |
| National Right to Life Committee                                        | 7  | 35 | 15 | 50 | 0.81        | 0.86 (0.47-1.57) | 0.62        | 0.81 (0.39-1.71) | 0.58 |
| Greenpeace                                                              | 4  | 35 | 20 | 45 | 0.90        | 0.99 (0.49-2.02) | 0.99        | 1.21 (0.47-3.12) | 0.70 |
| Sierra Club                                                             | 4  | 59 | 10 | 32 | <b>0.02</b> | 2.43 (1.11-5.32) | <b>0.03</b> | 0.83 (0.26-2.67) | 0.76 |
| Amnesty International                                                   | 3  | 63 | 9  | 28 | <b>0.02</b> | 2.96 (1.15-7.66) | <b>0.03</b> | 0.88 (0.22-3.52) | 0.86 |
| National Education Association                                          |    |    |    |    |             |                  |             |                  |      |
| Foundation                                                              | 6  | 35 | 12 | 53 | 0.54        | 0.82 (0.41-1.63) | 0.57        | 0.57 (0.19-1.69) | 0.31 |
| American Civil Liberties Union (ACLU)                                   | 5  | 54 | 15 | 31 | <b>0.03</b> | 2.31 (1.16-4.63) | <b>0.02</b> | 1.33 (0.56-3.14) | 0.51 |
| Americans for Prosperity                                                | 2  | 21 | 17 | 62 | 0.32        | 0.42 (0.13-1.34) | 0.14        | 0.74 (0.20-2.71) | 0.64 |
| MoveOn.org                                                              | 3  | 52 | 13 | 35 | 0.22        | 1.89 (0.80-4.45) | 0.14        | 1.01 (0.34-3.05) | 0.98 |
| The NAACP/National Association for<br>the Advancement of Colored People | 9  | 42 | 16 | 41 | 0.46        | 1.32 (0.83-2.09) | 0.23        | 1.05 (0.57-1.94) | 0.86 |
| American Red Cross                                                      | 20 | 42 | 15 | 43 | 0.33        | 1.27 (0.87-1.85) | 0.21        | 0.93 (0.56-1.54) | 0.76 |
| Chamber of Commerce                                                     | 3  | 38 | 17 | 45 | 0.98        | 1.07 (0.45-2.56) | 0.87        | 0.99 (0.31-3.19) | 0.99 |
| Freedom Caucus                                                          | 2  | 42 | 12 | 47 | 0.77        | 1.13 (0.46-2.73) | 0.79        | 0.68 (0.17-2.68) | 0.58 |
| None of these                                                           | 56 | 35 | 18 | 46 | 0.44        | 0.90 (0.67-1.22) | 0.50        | 1.17 (0.79-1.73) | 0.43 |

*Sources of Health Information*

Which of the following sources have you used to look for health and wellness related information or education in the past 12 months?

|                                                                                   |    |    |    |    |                 |                  |                 |                     |                 |
|-----------------------------------------------------------------------------------|----|----|----|----|-----------------|------------------|-----------------|---------------------|-----------------|
| Doctor                                                                            | 51 | 43 | 19 | 38 | <b>&lt;0.01</b> | 2.10 (1.54-2.85) | <b>&lt;0.01</b> | 1.77 (1.20-2.6)     | <b>&lt;0.01</b> |
| Pharmacist                                                                        | 18 | 43 | 21 | 37 | <b>0.04</b>     | 1.58 (1.06-2.36) | <b>0.03</b>     | 1.62 (0.99-2.65)    | 0.06            |
| Nurse, nurse practitioner or physician's assistant                                | 25 | 41 | 20 | 40 | 0.12            | 1.38 (0.96-1.99) | 0.08            | 1.45 (0.93-2.25)    | 0.10            |
| Relative, friend or co-worker                                                     | 24 | 36 | 18 | 46 | 0.98            | 0.98 (0.69-1.41) | 0.93            | 1.03 (0.66-1.62)    | 0.89            |
| Someone you know who has a particular medical condition                           | 10 | 36 | 17 | 47 | 0.97            | 0.94 (0.56-1.59) | 0.82            | 0.95 (0.50-1.81)    | 0.88            |
| Disease-related association or society                                            | 5  | 56 | 13 | 32 | <b>0.03</b>     | 2.29 (1.09-4.81) | <b>0.03</b>     | 1.03 (0.41-2.62)    | 0.94            |
| Patient support group or foundation                                               | 2  | 46 | 9  | 45 | 0.52            | 1.29 (0.46-3.64) | 0.63            | 0.5 (0.10-1.0-2.57) | 0.41            |
| Educational forum at a local clinic, hospital, community center or other location | 4  | 30 | 24 | 46 | 0.50            | 0.79 (0.35-1.79) | 0.58            | 1.38 (0.58-3.29)    | 0.46            |
| Pharmaceutical company                                                            | 1  | 33 | 21 | 46 | 0.91            | 0.89 (0.25-3.15) | 0.86            | 1.22 (0.30-5.01)    | 0.78            |
| Health insurance company                                                          | 6  | 55 | 15 | 30 | <b>0.01</b>     | 2.42 (1.26-4.66) | <b>0.01</b>     | 1.36 (0.62-2.96)    | 0.45            |
| Newspapers or magazines                                                           | 5  | 44 | 22 | 34 | 0.26            | 1.66 (0.80-3.41) | 0.17            | 1.79 (0.77-4.15)    | 0.17            |
| Television                                                                        | 6  | 34 | 16 | 50 | 0.83            | 0.86 (0.47-1.57) | 0.61            | 0.85 (0.41-1.77)    | 0.66            |

|                                                       |    |    |    |    |                 |                  |                 |                  |             |
|-------------------------------------------------------|----|----|----|----|-----------------|------------------|-----------------|------------------|-------------|
| The internet                                          | 45 | 39 | 17 | 44 | 0.41            | 1.23 (0.90-1.66) | 0.19            | 1.07 (0.73-1.57) | 0.73        |
| Social Media (such as Facebook, Twitter)              | 7  | 38 | 17 | 45 | 0.97            | 1.07 (0.58-1.98) | 0.83            | 1.02 (0.49-2.12) | 0.95        |
| Healthcare app for smartphone or tablet               | 6  | 30 | 26 | 44 | 0.22            | 0.82 (0.42-1.62) | 0.57            | 1.59 (0.79-3.21) | 0.20        |
| Have not looked for information in the past 12 months | 27 | 28 | 16 | 57 | <b>&lt;0.01</b> | 0.51 (0.36-0.72) | <b>&lt;0.01</b> | 0.63 (0.40-0.98) | <b>0.04</b> |

*Barriers, Specific Concerns and Other Reasons For  
Not Getting the Flu Vaccine*

Of those who did not get a flu shot this  
past year: this is because...<sup>i</sup>

|                                    |    |    |    |    |                 |                   |                 |                  |             |
|------------------------------------|----|----|----|----|-----------------|-------------------|-----------------|------------------|-------------|
| The flu is not a serious illness   | 11 | 19 | 16 | 65 | 0.50            | 0.64 (0.29-1.4)   | 0.26            | 0.90 (0.41-1.96) | 0.79        |
| I'm healthy                        | 25 | 24 | 14 | 61 | 0.77            | 0.89 (0.54-1.46)  | 0.64            | 0.82 (0.45-1.48) | 0.51        |
| I just didn't think about it       | 20 | 36 | 9  | 56 | <b>0.01</b>     | 1.66 (1.03-2.68)  | <b>0.04</b>     | 0.52 (0.24-1.11) | 0.09        |
| I didn't know where to get it      | 1  | 13 | 0  | 87 | 0.37            | 0.34 (0.05-2.47)  | 0.29            |                  |             |
| I didn't have health insurance     | 3  | 38 | 2  | 60 | 0.07            | 1.45 (0.59-3.54)  | 0.42            | 0.12 (0.02-0.96) | <b>0.05</b> |
| I didn't have time                 | 4  | 67 | 6  | 27 | <b>&lt;0.01</b> | 6.25 (2.33-16.73) | <b>&lt;0.01</b> | 0.8 (0.16-4.05)  | 0.79        |
| I don't believe in vaccines        | 8  | 3  | 10 | 87 | <b>&lt;0.01</b> | 0.08 (0.03-0.22)  | <b>&lt;0.01</b> | 0.37 (0.15-0.92) | <b>0.03</b> |
| I'm afraid of the side effects     | 13 | 19 | 15 | 66 | 0.36            | 0.64 (0.34-1.23)  | 0.18            | 0.79 (0.39-1.59) | 0.51        |
| I'm afraid of needles              | 4  | 26 | 21 | 53 | 0.73            | 1.15 (0.42-3.15)  | 0.79            | 1.51 (0.55-4.12) | 0.42        |
| I prefer alternative (homeopathic) | 13 | 19 | 15 | 66 | 0.31            | 0.61 (0.32-1.17)  | 0.13            | 0.81 (0.40-1.67) | 0.57        |

medicine to vaccines

|                                                      |    |    |    |    |             |                  |             |                  |             |
|------------------------------------------------------|----|----|----|----|-------------|------------------|-------------|------------------|-------------|
| I have never had the flu                             | 13 | 33 | 7  | 59 | 0.05        | 1.36 (0.79-2.34) | 0.26        | 0.43 (0.17-1.07) | 0.07        |
| The vaccine will make me sick with the flu           | 10 | 15 | 13 | 72 | 0.06        | 0.44 (0.21-0.90) | <b>0.03</b> | 0.63 (0.28-1.39) | 0.25        |
| I got a flu shot the year before so I didn't need it | 3  | 15 | 2  | 83 | <b>0.01</b> | 0.39 (0.14-1.13) | 0.08        | 0.11 (0.01-0.84) | <b>0.03</b> |
| Another reason                                       | 28 | 19 | 22 | 58 | <b>0.01</b> | 0.69 (0.43-1.11) | 0.12        | 1.68 (1.01-2.78) | <b>0.04</b> |

Red text indicates survey items reflecting negative vaccine attitudes

<sup>a</sup> Column percentages (of hesitant), weighted according to survey weights to achieve national representativeness

<sup>b</sup> Column percentages (of corresponding hesitancy categories) (except for first row "All" which is a row percentage), weighted according to survey weights to achieve national representativeness

<sup>c</sup> using the Pearson chi-square test at significance level of alpha=5%; bold indicates statistical significance (p<0.05)

<sup>d</sup> Construct scales combine scores for each relevant survey item (reversing negative items) and divide by maximum (e.g., 100 being complete trust and 0 being complete distrust); after dichotomizing at median, binary variable represents high vs low score (e.g., 1 being high trust and 0 being low trust)

<sup>e</sup> Likert scale response options (strongly agree, agree, disagree, strongly disagree, don't know) dichotomized to agree/disagree (don't know coded as disagree), results for agreement shown; other scale response options dichotomized to reflect affirmative/negative, results for affirmative shown

<sup>i</sup> Odds Ratio (95% Confidence Interval) of hesitating before vaccinating vs not yet vaccinating for affirmative survey response vs not

<sup>k</sup> Reference category for logistic regression of categorical variables
